# Supplementary material for: The enantioselective total synthesis of ROCK-inhibitor ( S )-Netarsudil (Rhopressa) via asymmetric organocatalysis
Source: Royal Society of Chemistry journal article supplement (doi:10.1039/d5ob01899d), 2026-01-01
Supplement: d5ob01899d1.pdf [file d5ob01899d1.pdf]

## SUPPORTING INFORMATION

Enantioselective Total Synthesis of ROCK-inhibitor (*S*)-Netarsudil (Rhopressa) *via* Asymmetric Organocatalysis.

R. A. Kovalevsky<sup>a</sup>, A. S. Kucherenko<sup>a\*</sup>, Sergei G. Zlotin<sup>a\*</sup>

Emails: [alexkucherenko@yandex.ru](mailto:alexkucherenko@yandex.ru), [zlotin@ioc.ac.ru](mailto:zlotin@ioc.ac.ru)

<sup>a</sup> *N.D. Zelinsky Institute of Organic Chemistry, Russian Academy of Sciences, 47 Leninsky Prospect, 119991, Moscow, Russian Federation*

## Table of Contents

|                                                                                         |    |
|-----------------------------------------------------------------------------------------|----|
| General Information.....                                                                | 3  |
| 2. Experimental procedures.....                                                         | 4  |
| 2.1. Stage 1. Synthesis of $\beta$ -nitrostyrene 10.....                                | 4  |
| 2.2. Stage 2. Synthesis of $\beta$ -nitrostyrene 7.....                                 | 5  |
| 2.3. Stage 3. Asymmetric organocatalytic Michael reaction .....                         | 6  |
| 2.4. Procedure for regeneration of catalyst <i>ent</i> -IV .....                        | 7  |
| 2.5.1. Optimization of oxidative fragmentation process .....                            | 8  |
| 2.5.2. Stage 4. Oxidative fragmentation of Michael adduct <i>ent</i> -9.....            | 9  |
| 2.6. Stage 5. Reduction of $\beta$ -nitroester 12 .....                                 | 10 |
| 2.7. Stage 6. Hydrolysis of <i>N</i> -Boc-protected $\beta$ -amino ester 13 .....       | 11 |
| 2.8. Stage 7. Amidation reaction between 14 and 15.....                                 | 12 |
| 2.9. Stage 8. Boc-deprotection of amide 16: Synthesis of Netarsudil dimesylate (1)..... | 13 |
| 3. NMR pictures for all compounds .....                                                 | 16 |
| 4. HPLC data for all compounds.....                                                     | 24 |
| References.....                                                                         | 29 |

## General Information

The  $^1\text{H}$ ,  $^{13}\text{C}$  NMR spectra were recorded on a 300 MHz and 600 MHz spectrometers. For  $^1\text{H}$  NMR, chemical shifts ( $\delta$ ) were given in ppm using residual undeuterated solvent as internal standard ( $\text{CDCl}_3$  at 7.28 ppm,  $\text{DMSO-}d_6$  at 2.51 ppm,  $\text{CD}_3\text{OD}$  at 3.33). For  $^{13}\text{C}$  NMR, chemical shifts ( $\delta$ ) were reported in ppm using solvent as internal standard ( $\text{CDCl}_3$  at 77.0 ppm,  $\text{DMSO-}d_6$  at 40.0 ppm,  $\text{CD}_3\text{OD}$  at 47.6). The following abbreviations were used to explain multiplicities: s = singlet, d = doublet, t = triplet, q = quartet, dd = doublet of doublets, tt = triplet of triplets, m = multiplet, brs = broad singlet. Coupling constants are reported as a  $J$  value in Hertz (Hz). The high-resolution mass spectra (HRMS) were recorded using electrospray ionization (ESI) and a time-of-flight (TOF) mass analyzer. The measurements were taken in the positive ion mode (interface capillary voltage 4500 V) in the mass range from  $m/z = 50$  Da to  $m/z = 3000$  Da; external and internal calibrations were done with the electrospray calibrant solution. For centrifugation was used ultramicrocentrifuge with 21.000 rpm speed. HPLC analyses were performed on an HPLC system equipped with chiral stationary phase columns (AD-H, OD-H, OJ-H, AS-H), detection at 220 nm. Allomaltol **8** are commercially available. Catalysts **I-XII** were synthesized by reported procedures,<sup>1-6</sup> catalysts **XIII**, **XIV** are commercially available. Reagents and solvents were purified according to standard methods.

## 2. Experimental procedures

### 2.1. Stage 1. Synthesis of $\beta$ -nitrostyrene 10

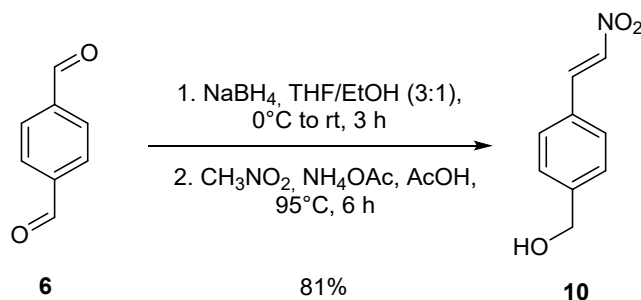

Compound **10** was prepared according to a modified literature procedure<sup>7</sup>. NaBH<sub>4</sub> (5.6 g, 0.15 mol, 0.25 equiv.) was added to a stirred solution of terephthalic aldehyde (80.0 g, 0.60 mol) in EtOH/THF (1:3, 400 mL) by small portions for 15 min at the 0°C. The reaction mixture was stirred for 3 h. Then HCl (1M) was added to pH 4. The solvents were evaporated, the slurry residue was redissolved in EtOAc (250 mL) and washed with water (3 x 150 mL). The combined organic layers were dried over anhydrous Na<sub>2</sub>SO<sub>4</sub>, the solvent was evaporated to afford crude 4-(hydroxymethyl)-benzaldehyde which was used in the next step without further purification.

NH<sub>4</sub>OAc (137.9 g, 1.79 mol, 3 equiv.) and MeNO<sub>2</sub> (160 mL, 2.99 mol, 5 equiv.) were added sequentially to a solution of the crude 4-(hydroxymethyl)-benzaldehyde in AcOH (450 mL). The reaction mixture was gently refluxed at 95 °C for 6 h and cooled down to ambient temperature. The acetic acid was evaporated under reduced pressure, the EtOAc (300 mL) was added to the residue and the organic phase was washed with brine (3 x 150 mL). The organic layer was dried over anhydrous Na<sub>2</sub>SO<sub>4</sub> and concentrated in vacuo. MeOH (150 mL) and AcCl (0.9 mL, 12 mmol, 2 mol.%) were sequentially added to the residue and the mixture was stirred. for 3 h. The solvent was evaporated, the residue was recrystallized from CHCl<sub>3</sub> to afford analytically pure  $\beta$ -nitrostyrene **10**.

(*E*)-(4-(2-Nitrovinyl)phenyl)methanol (**10**)

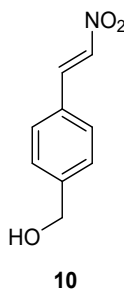

**Physical state** yellow powder;

**Yield** 86.6 g (81 %);

**MP** 113-114 °C (lit.<sup>8</sup> 114 - 115.5 °C)

**<sup>1</sup>H NMR (300 MHz, CDCl<sub>3</sub>)** δ 8.01 (d, *J* = 13.7 Hz, 1H), 7.62-7.55 (m, 3H), 7.47 (d, *J* = 8.1 Hz, 2H), 4.78 (s, 2H), 1.97 (brs, 1H).

The <sup>1</sup>H NMR spectrum corresponds to literature data.<sup>9</sup>

## 2.2. Stage 2. Synthesis of β-nitrostyrene 7

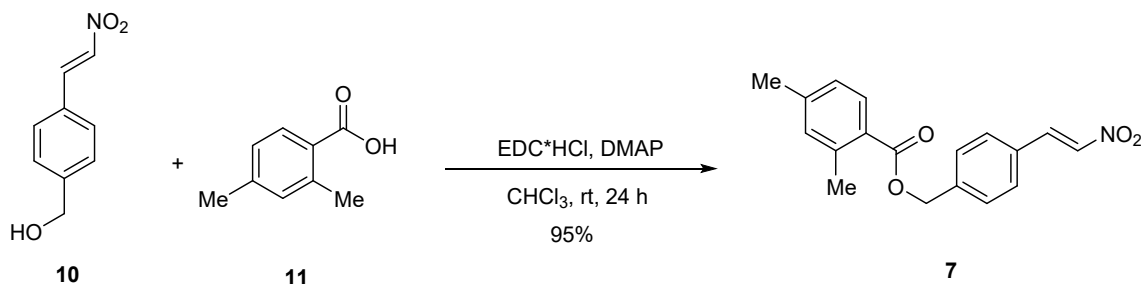

β-Nitrostyrene **10** (35.8 g, 0.20 mol) was added to a solution of 2,4-dimethylbenzoic acid (**11**) (30.0 g, 0.20 mol), EDC·HCl (57.5 g, 0.30 mol, 1.5 equiv.), and DMAP (2.5 g, 20 mmol, 10 mol.%) in chloroform (250 mL). The reaction mixture was stirred for 24 h and washed with aq. NaHCO<sub>3</sub> (3 x 150 mL). The combined organic layers were dried over anhydrous Na<sub>2</sub>SO<sub>4</sub>. The solvent was evaporated and the residue was recrystallized from *n*-hexane/EtOAc solvent system to afford analytically pure β-nitrostyrene **7**.

(*E*)-4-(2-Nitrovinyl)benzyl 2,4-dimethylbenzoate (**7**)

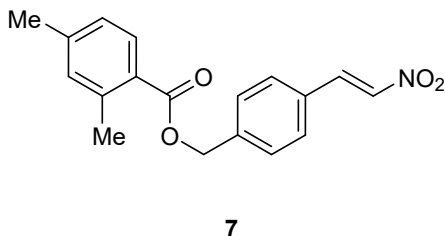

**Physical state** yellow needles;

**MP** 79-81°C;

**Yield** 59.1 g (95 %);

**<sup>1</sup>H NMR (300 MHz, CDCl<sub>3</sub>)** δ 8.03 (d, *J* = 13.7 Hz, 1H), 7.91 (d, *J* = 7.9 Hz, 1H), 7.64-7.52 (m, 5H), 7.09-7.07 (m, 2H), 5.38 (s, 2H), 2.60 (s, 3H), 2.38 (s, 3H);

**<sup>13</sup>C NMR (75 MHz, CDCl<sub>3</sub>)** δ 191.8, 167.0, 143.0, 140.8, 140.7, 138.5, 137.3, 132.7, 130.9, 130.0, 129.8, 129.4, 128.7, 128.1, 126.6, 126.0, 65.4, 21.9, 21.4;

**HRMS (ESI-TOF)** *m/z* calcd. for [C<sub>18</sub>H<sub>18</sub>NO<sub>4</sub><sup>+</sup>] (*M*+H<sup>+</sup>) 312.1230, found 312.1235.

### 2.3. Stage 3. Asymmetric organocatalytic Michael reaction

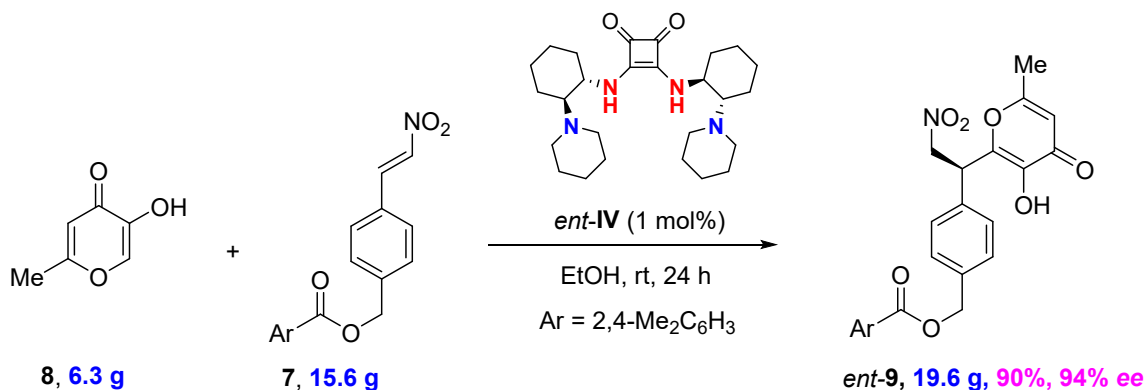

Catalyst *ent*-IV (221 mg, 0.5 mmol, 1 mol.%) was added to a solution of allomaltol **8** (6.3 g, 50.0 mmol) and  $\beta$ -nitrostyrene **7** (15.6 g, 50.0 mmol) in EtOH (95%) (120 mL) and the reaction mixture was stirred for 24 h. The solvent was evaporated. The residue was dissolved in Et<sub>2</sub>O (100 mL) and filtered through a short plug of SG. Evaporation of the solvent afforded analytically pure adduct *ent*-9.

(*S*)-4-(1-(3-Hydroxy-6-methyl-4-oxo-4H-pyran-2-yl)-2-nitroethyl)benzyl 2,4-dimethylbenzoate (*ent*-9)

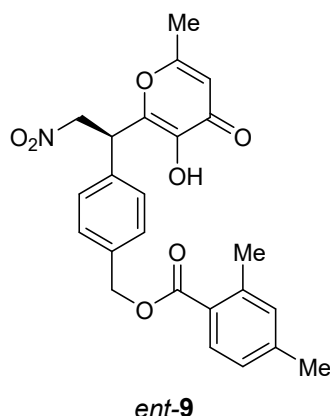

**Physical state** brown foam;

**Yield** 19.6 g (90 %);

**<sup>1</sup>H NMR (300 MHz, CDCl<sub>3</sub>)**  $\delta$  7.88 (d, *J* = 7.8 Hz, 1H), 7.46 (d, *J* = 8.0 Hz, 2H), 7.39 (d, *J* = 8.0 Hz, 2H), 7.07-7.04 (m, 2H), 6.24 (s, 1H), 5.32 (s, 2H), 5.25-5.09 (m, 2H), 4.94 (dd, *J* = 12.6, 6.2 Hz, 1H), 2.59 (s, 3H), 2.36 (s, 3H), 2.32 (s, 3H);

**<sup>13</sup>C NMR (75 MHz, CDCl<sub>3</sub>)**  $\delta$  173.9, 167.1, 165.7, 146.1, 142.8, 141.7, 140.6, 136.9, 135.3, 132.6, 130.9, 128.9, 128.0, 126.5, 126.2, 110.9, 75.3, 65.6, 43.0, 21.9, 21.4, 20.1;

**HPLC data:** 94% *ee* (CHIRALPAK AD-H column, *n*-hexane/*i*-PrOH 90:10, flow rate 1.00 mL/min, 220 nm; *t*<sub>R</sub>)<sub>minor</sub> = 19.8 min, *t*<sub>R</sub>)<sub>major</sub> = 25.4 min.);

**HRMS (ESI-TOF)** *m/z* calcd. for [C<sub>24</sub>H<sub>24</sub>NO<sub>7</sub><sup>+</sup>] (*M*+*H*<sup>+</sup>) 438.1547, found 438.1559.

## 2.4. Procedure for regeneration of catalyst *ent-IV*

Catalyst *ent-IV* (1 mol%, 4 mg) was added to a solution of allomaltol **8** (126 mg, 1 mmol) and  $\beta$ -nitrostyrene **7** (311 mg, 1 mmol) in ethanol (5 mL) and the reaction mixture was stirred at ambient temperature for 24 h. The solvent was evaporated and the Michael adduct *ent-9* was extracted with Et<sub>2</sub>O (3 x 15 mL) with careful decantation of the organic layers. The solid catalyst *ent-IV* remaining in the flask was dried under reduced pressure (50 Torr, 60°C, 1 h). Then, fresh portions of reagents **8**, **7**, and EtOH were added to the flask and the reaction was re-performed as described above. The same catalyst sample could be recovered 4 times while retaining high product yield and very good stereoinduction (see table S1).

**Table S1 (Detalization of Figure 2 in the manuscript)**

| Cycle    | Yield of <i>ent-9</i> , % | <i>ee</i> , % |
|----------|---------------------------|---------------|
| <b>1</b> | 90                        | 94            |
| <b>2</b> | 91                        | 93            |
| <b>3</b> | 88                        | 94            |
| <b>4</b> | 90                        | 93            |
| <b>5</b> | 75                        | 91            |

## 2.5.1. Optimization of oxidative fragmentation process

**Table 2.** Optimization of oxidative fragmentation system.<sup>a</sup>

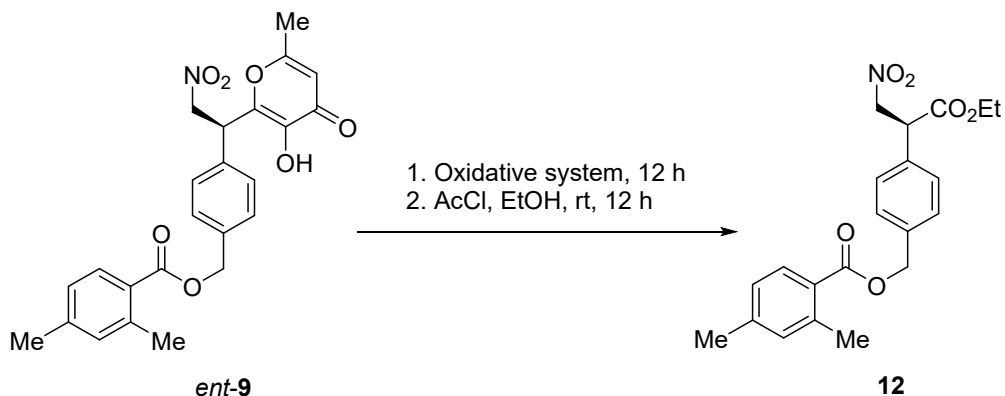

| Entry | Oxidative system                                           | Ru <sup>III</sup> /NaIO <sub>4</sub><br>(mol.%/equiv.) | Solvent system<br>(vol.%/vol.%/vol.%)                         | Yield, <b>12</b> (%) <sup>b</sup> |
|-------|------------------------------------------------------------|--------------------------------------------------------|---------------------------------------------------------------|-----------------------------------|
| 1     | RuCl <sub>3</sub> ·3H <sub>2</sub> O,<br>NaIO <sub>4</sub> | 1:10                                                   | CH <sub>3</sub> CN/CCl <sub>4</sub> /H <sub>2</sub> O (2:2:5) | 92%                               |
| 2     | RuCl <sub>3</sub> ·3H <sub>2</sub> O,<br>NaIO <sub>4</sub> | 2:10                                                   | CH <sub>3</sub> CN/CCl <sub>4</sub> /H <sub>2</sub> O(2:2:5)  | 85%                               |
| 3     | RuCl <sub>3</sub> ·3H <sub>2</sub> O,<br>NaIO <sub>4</sub> | 1:20                                                   | CH <sub>3</sub> CN/CCl <sub>4</sub> /H <sub>2</sub> O(2:2:5)  | 93%                               |
| 4     | RuCl <sub>3</sub> ·3H <sub>2</sub> O,<br>NaIO <sub>4</sub> | 0.5:10                                                 | CH <sub>3</sub> CN/CCl <sub>4</sub> /H <sub>2</sub> O(2:2:5)  | 43%                               |
| 5     | RuCl <sub>3</sub> ·3H <sub>2</sub> O,<br>NaIO <sub>4</sub> | 1:5                                                    | CH <sub>3</sub> CN/CCl <sub>4</sub> /H <sub>2</sub> O(2:2:5)  | 65%                               |
| 6     | RuCl <sub>3</sub> ·3H <sub>2</sub> O,<br>NaIO <sub>4</sub> | 0:10                                                   | CH <sub>3</sub> CN/CCl <sub>4</sub> /H <sub>2</sub> O(2:2:5)  | nr                                |
| 7     | RuCl <sub>3</sub> ·3H <sub>2</sub> O,<br>NaIO <sub>4</sub> | 1:0                                                    | CH <sub>3</sub> CN/CCl <sub>4</sub> /H <sub>2</sub> O(2:2:5)  | nr                                |
| 8     | RuCl <sub>3</sub> ·3H <sub>2</sub> O,<br>NaIO <sub>4</sub> | 1:10                                                   | CH <sub>3</sub> CN/EtOAc/H <sub>2</sub> O(2:2:5)              | 61%                               |
| 9     | RuCl <sub>3</sub> ·3H <sub>2</sub> O,<br>NaIO <sub>4</sub> | 1:10                                                   | CH <sub>3</sub> CN/DCM/H <sub>2</sub> O(2:2:5)                | 76%                               |

<sup>a</sup>Unless otherwise specified, the reactions were carried out with corresponding oxidative system, *ent-9* (43.7 mg, 0.1 mmol) in the corresponding solvent system (1.0 mL) at ambient temperature for 24 h. <sup>b</sup>Yield obtained after extraction, filtration through SG and evaporation of solvent.



### 2.5.2. Stage 4. Oxidative fragmentation of Michael adduct *ent-9*

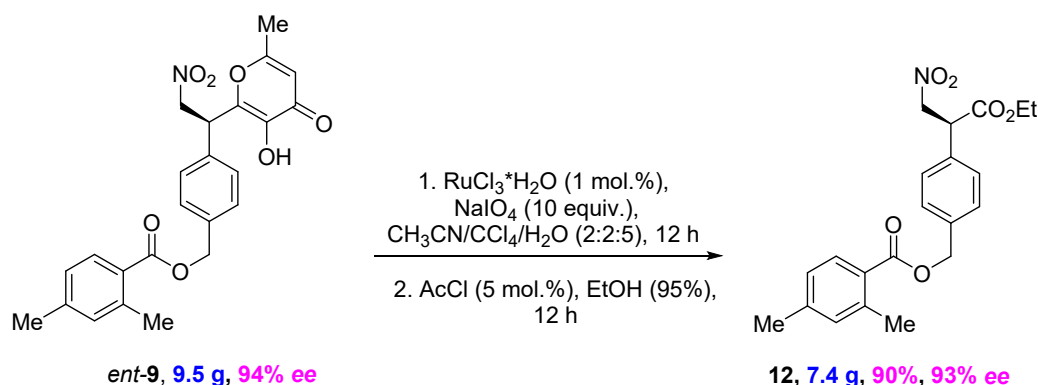

Water (150 mL) and  $\text{NaIO}_4$  (46.5 g, 21.7 mmol, 10 equiv.) were added sequentially to a solution of *ent-9* (9.5 g, 21.7 mmol) in  $\text{CH}_3\text{CN}/\text{CCl}_4$  (1 : 1) solvent system (120 mL) and the mixture was stirred for 5 min. Then, the  $\text{RuCl}_3 \cdot 3\text{H}_2\text{O}$  (56.8 mg, 0.22 mmol, 1 mol.%) was added and the suspension was stirred at ambient temperature for 12 h. Inorganic components were filtered off and the filtrate was extracted with  $\text{EtOAc}$  ( $3 \times 100$  mL). The combined organic layers were dried over anhydrous  $\text{Na}_2\text{SO}_4$ , the solvent was evaporated. The residue was dissolved in  $\text{Et}_2\text{O}$  (70 mL) and the solution was passed through a short plug of SG, the solvent was evaporated to afford crude  $\beta$ -nitrocarboxylic acid.

The crude acid was dissolved in  $\text{EtOH}$  (95%) (30 mL) and  $\text{AcCl}$  (1.5 mL) was carefully added to the solution. The reaction mixture was stirred for 12 h. The volatile materials were evaporated. The residue was purified by CC on SG ( $\text{EtOAc}/n\text{-hexane} = 1:3$  eluent system) to afford analytically pure  $\beta$ -nitroester **12**.

(*S*)-4-(1-Ethoxy-3-nitro-1-oxopropan-2-yl)benzyl 2,4-dimethylbenzoate (**12**)

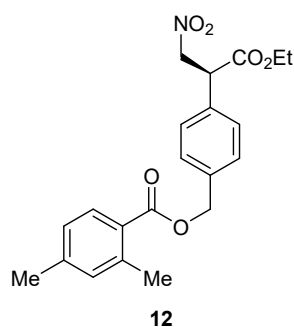

**Physical state** light-yellow oil;

**Yield** 7.4 g (90 %);

**$^1\text{H}$  NMR (300 MHz,  $\text{CDCl}_3$ )**  $\delta$  7.89 (d,  $J = 7.8$  Hz, 1H), 7.47 (d,  $J = 8.1$  Hz, 2H), 7.31 (d,  $J = 8.1$  Hz, 2H), 5.33 (s, 2H), 5.12 (dd,  $J = 14.5, 9.8$  Hz, 1H), 4.57 (dd,  $J = 14.5, 5.2$  Hz, 1H), 4.46 (dd,  $J = 9.8, 5.2$  Hz, 1H), 4.32-4.22 (m, 1H), 4.22-4.12 (m, 1H), 2.60 (s, 3H), 2.37 (s, 3H), 1.25 (t,  $J = 7.1$  Hz, 3H);

$^{13}\text{C}$  NMR (75 MHz,  $\text{CDCl}_3$ )  $\delta$  170.4, 167.1, 142.8, 140.6, 137.0, 133.2, 132.6, 130.9, 128.9, 128.1, 126.5, 126.2, 65.5, 62.0, 48.5, 21.8, 21.4, 14.0;

**HPLC data:** 93% *ee* (CHIRALPAK AS-H column, *n*-hexane/*i*-PrOH 90:10, flow rate 1.00 mL/min, 220 nm;  $t_{\text{R}}^{\text{major}}$  = 13.8 min,  $t_{\text{R}}^{\text{minor}}$  = 16.1 min);

**HRMS (ESI-TOF)**  $m/z$  calcd. for  $[\text{C}_{21}\text{H}_{27}\text{N}_2\text{O}_6]^+$  ( $\text{M}+\text{NH}_4^+$ ) 403.1864, found 403.1848.

## 2.6. Stage 5. Reduction of $\beta$ -nitroester **12**

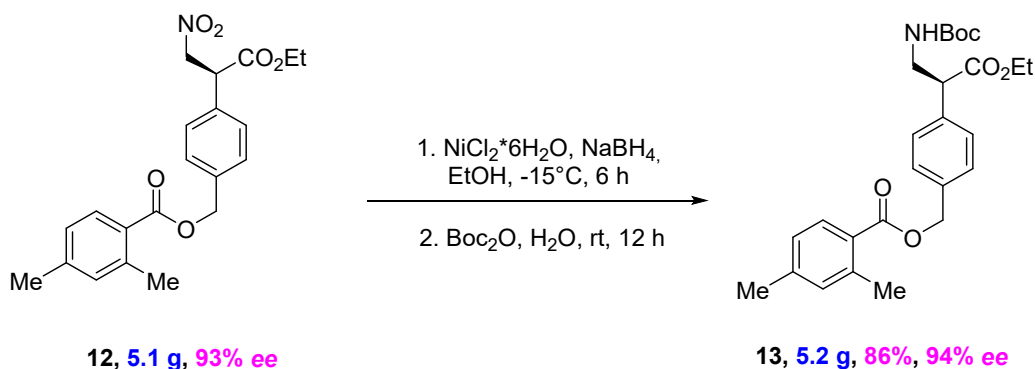

Nitroester **12** (5.1 g, 13.2 mmol) and  $\text{NaBH}_4$  (2.5 g, 66.0 mmol, 5 equiv.) were added sequentially to a stirred solution of  $\text{NiCl}_2 \cdot 6\text{H}_2\text{O}$  (3.5 g, 14.5 mmol, 1.1 equiv.) in EtOH (95%) (80 mL) at  $-15^\circ\text{C}$  (ice/salt bath) and the resulting suspension was stirred for 15 min at  $0^\circ\text{C}$ . The reaction mixture was adjusted to pH 3 by HCl (2M) and then adjusted to pH 9 by aq.  $\text{NaHCO}_3$ . The black precipitate was filtered off and the filtrate was extracted with DCM (3 x 100 mL). The combined organic layers were dried over anhydrous  $\text{Na}_2\text{SO}_4$ , the solvent was evaporated to afford crude  $\beta$ -amino ester.

The crude amino ester was dissolved in  $\text{H}_2\text{O}$  (20 mL) and  $\text{Boc}_2\text{O}$  (3.2 g, 14.5 mmol, 1.1 equiv.) was added to the solution in one portion. The reaction mixture was stirred for 12 h, extracted with  $\text{CH}_2\text{Cl}_2$  (3 x 100 mL) and washed with brine (3 x 100 mL). The combined organic layers were dried over anhydrous  $\text{Na}_2\text{SO}_4$ , the solvent was evaporated. The residue was purified by CC on SG (EtOAc/*n*-hexane = 1:6 eluent system) to afford analytically pure *N*-Boc-protected  $\beta$ -amino ester **13**.

(*S*)-4-(3-((*tert*-Butoxycarbonyl)amino)-1-ethoxy-1-oxopropan-2-yl)benzyl 2,4-dimethylbenzoate  
(**13**)

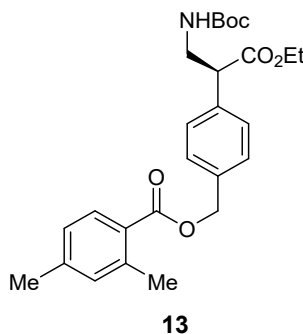

**Physical state** colorless oil;

**Yield** 5.2 g (86 %);

**<sup>1</sup>H NMR (300 MHz, CDCl<sub>3</sub>)** δ 7.89 (d, *J* = 7.8 Hz, 1H), 7.42 (d, *J* = 8.0 Hz, 2H), 7.30 (d, *J* = 8.0 Hz, 2H), 7.07-7.05 (m, 2H), 5.32 (s, 2H), 4.89 (brs, 1H), 4.24-4.11 (m, 2H), 3.93-3.89 (m, 1H), 3.68-3.47 (m, 1H), 2.60 (s, 3H), 2.37 (s, 3H), 1.44 (s, 9H), 1.23 (t, *J* = 7.2 Hz, 3H);

**<sup>13</sup>C NMR (75 MHz, CDCl<sub>3</sub>)** δ 178.7, 167.2, 157.7, 142.7, 140.6, 136.4, 135.8, 132.5, 130.9, 128.5, 128.2, 126.5, 126.4, 79.7, 65.8, 61.1, 51.3, 43.4, 28.3, 21.8, 21.4, 14.1

**HPLC data:** 94% *ee* (CHIRALPAK OJ-H column, *n*-hexane/*i*-PrOH 90:10, flow rate 1.00 mL/min, 220 nm; *t*<sub>(R)</sub>major = 6.3 min, *t*<sub>(R)</sub>minor = 7.5 min);

**HRMS (ESI-TOF)** *m/z* calcd. for [C<sub>26</sub>H<sub>37</sub>N<sub>2</sub>O<sub>6</sub><sup>+</sup>] (*M*+NH<sub>4</sub><sup>+</sup>) 473.2646, found 473.2657.

## 2.7. Stage 6. Hydrolysis of *N*-Boc-protected β-amino ester **13**

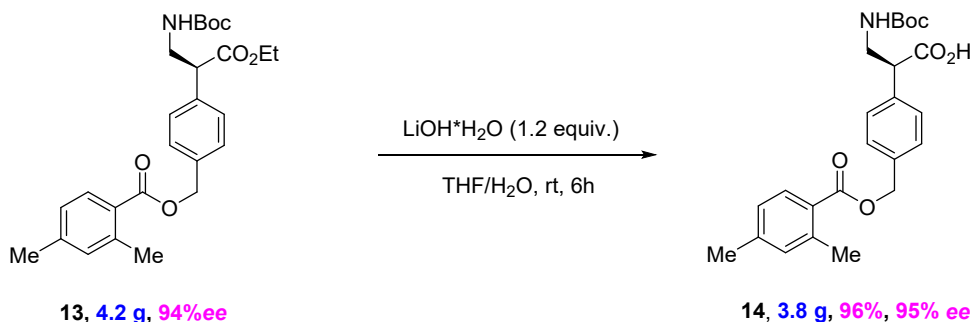

A solution of LiOH·H<sub>2</sub>O (465 mg, 11.1 mmol, 1.2 equiv.) in H<sub>2</sub>O (5 mL) was added in one portion to a stirred solution of ester **13** (4.2 g, 9.2 mmol) in THF (25 mL). The reaction mixture was stirred for 6 h at ambient temperature. Then it was adjusted to pH 5 with HCl (2M), and extracted with EtOAc (3 x 70 mL). The combined organic layer was washed with brine (3 x 70 mL) and dried over anhydrous Na<sub>2</sub>SO<sub>4</sub>. The solvent was evaporated. The residue was recrystallized from *n*-hexane/EtOAc to afford analytically pure *N*-Boc-protected aminoacid **14**.

(*S*)-3-((*tert*-Butoxycarbonyl)amino)-2-(4-(((2,4-dimethylbenzoyl)oxy)methyl)phenyl)propanoic acid (**14**)

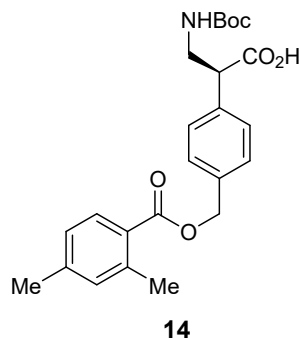

**Physical state** colorless crystals;

**MP** 99-100°C (lit.<sup>11</sup>98-100 °C)

**Yield** 3.8 g (96 %);

**<sup>1</sup>H NMR (300 MHz, CDCl<sub>3</sub>)** δ 7.89 (d, *J* = 7.9 Hz, 1H), 7.44 (d, *J* = 8.0 Hz, 2H), 7.31 (d, *J* = 8.0 Hz, 2H), 7.07 (s, 1H), 7.04 (d, *J* = 8.4 Hz, 1H), 5.32 (s, 2H), 5.02 (br s, 1H), 3.95–3.85 (m, 1H), 3.62–3.54 (m, 2H), 2.60 (s, 3H), 2.37 (s, 3H), 1.44 (s, 9H);

**<sup>13</sup>C NMR (75 MHz, CDCl<sub>3</sub>)** δ 176.2, 167.2, 157.9, 142.7, 140.6, 136.0, 135.9, 132.5, 130.9, 128.7, 128.3, 126.5, 126.3, 81.5, 65.8, 52.3, 44.6, 28.3, 21.9, 21.4;

**HPLC data:** 95% *ee* (CHIRALPAK AD-H column, *n*-hexane/*i*-PrOH 70:30, flow rate 1.00 mL/min, 220 nm; *t*<sub>(R)</sub>major = 5.5 min, *t*<sub>(R)</sub>minor = 7.7 min);

**HRMS (ESI-TOF)** *m/z* calcd. for [C<sub>24</sub>H<sub>30</sub>NO<sub>6</sub><sup>+</sup>] (*M*+H<sup>+</sup>) 428.2068, found 428.2060.

## 2.8. Stage 7. Amidation reaction between **14** and **15**

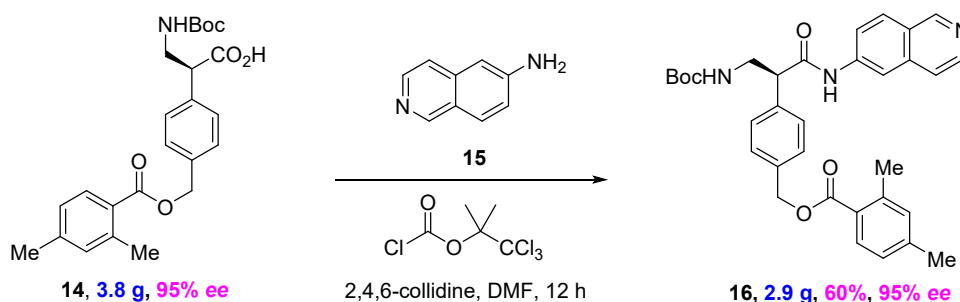

6-Aminoisoquinoline (**15**) (1.28 g, 8.9 mmol) and 2,4,6-collidine (1.40 g, 11.6 mmol) were added to a stirred solution of *N*-Boc-protected aminoacid **14** (3.8 g, 8.9 mmol) in DMF (15 mL) at 0 °C. After 10 min, a solution of 2,2,2-trichloro-1,1-dimethylethyl chloroformate (2.78 g, 11.6 mmol) in DMF (10 mL) was added to the reaction mixture. After stirring at 0 °C for 12 h, the mixture was poured into aq. NaHCO<sub>3</sub> /EtOAc (1:1, 100 mL) and extracted with EtOAc (3 x 50 mL). The organic layers were washed brine (3 x 70 mL), dried over anhydrous Na<sub>2</sub>SO<sub>4</sub>. The solvent was evaporated. The residue was purified by CC on SG (EtOAc/*n*-hexane = 4:1 eluent system) to afford analytically pure Boc-amide **16**.

(*S*)-4-(3-((*tert*-Butoxycarbonyl)amino)-1-(isoquinolin-6-ylamino)-1-oxopropan-2-yl)benzyl 2,4-dimethylbenzoate (**16**)

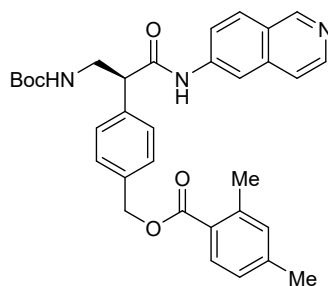

**16**

**Physical state** light-yellow solid;

**MP** 153-154°C (lit.<sup>11</sup> 155 - 156°C)

**Yield** 2.9 g (60 %);

**<sup>1</sup>H NMR (300 MHz, DMSO-*d*<sub>6</sub>)** δ 10.60 (brs, 1H), 9.15 (brs, 1H), 8.40 (s, 1H), 8.03 (d, *J* = 8.4 Hz, 1H), 7.78-7.70 (m, 3H), 7.44 (brs, 4H), 7.12-7.03 (m, 3H), 5.27 (m, 2H), 4.13 (brs, 1H), 3.57 (brs, 1H), 2.48 (s, 3H), 2.30 (s, 3H), 1.34 (s, 9H);

**<sup>13</sup>C NMR (75 MHz, DMSO-*d*<sub>6</sub>)** δ 171.5, 166.9, 156.2, 152.0, 143.7, 142.9, 140.9, 140.0, 136.6, 135.7, 132.8, 130.9, 129.0, 128.7, 128.5, 127.1, 121.5, 120.5, 113.6, 78.2, 66.1, 52.2, 43.5, 28.7, 21.7, 21.3;

**HPLC data:** 95% *ee* (CHIRALPAK AD-H column, *n*-hexane/*i*-PrOH 70:30, flow rate 1.00 mL/min, 220 nm; *t*<sub>R</sub>minor= 11.7 min, *t*<sub>R</sub>major = 15.3 min);

**HRMS (ESI-TOF)** *m/z* calcd. for [C<sub>33</sub>H<sub>35</sub>N<sub>3</sub>O<sub>5</sub><sup>+</sup>] (*M*+*H*<sup>+</sup>) 554.2649, found 554.2647.

## 2.9. Stage 8. Boc-deprotection of amide **16**: Synthesis of Netarsudil dimesylate (**1**)

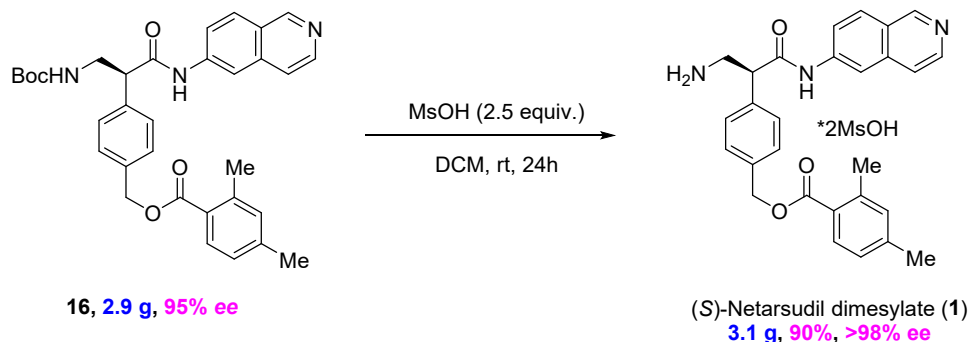

Methanesulfonic acid (0.85 mL, 13.1 mmol, 2.5 equiv.) was added to a solution of *N*-Boc-amide **16** (2.9 g, 5.2 mmol) in CH<sub>2</sub>Cl<sub>2</sub> (15 mL) and the solution was stirred for 24 h at ambient temperature. The solvent was evaporated and the residue was recrystallized from isopropanol to afford analytically pure (*S*)-Netarsudil dimesylate (**1**).

(S)-4-(3-Amino-1-(isoquinolin-6-ylamino)-1-oxopropan-2-yl)benzyl  
dimesylate (**1**)

2,4-dimethylbenzoate

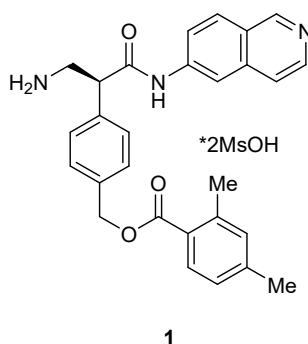

**Physical state** white solid;

**MP** 123 - 125°C (lit.<sup>11</sup> 122 - 133°C)

**Yield** 3.1 g (90 %);

**<sup>1</sup>H NMR (600 MHz, MeOH-*d*<sub>4</sub>)** δ 9.51 (s, 1H), 8.73 (d, *J* = 1.6 Hz, 1H), 8.42 (d, *J* = 6.7 Hz, 1H), 8.34 (d, *J* = 9.1 Hz, 1H), 8.21 (d, *J* = 6.6 Hz, 1H), 8.02 (dd, *J* = 9.1, 1.8 Hz, 1H), 7.73 (d, *J* = 8.0 Hz, 1H), 7.59 (d, *J* = 8.3 Hz, 2H), 7.54 (d, *J* = 8.3 Hz, 2H), 7.02 (s, 1H), 6.99 (d, *J* = 8.1 Hz, 1H), 5.30 (s, 2H), 4.40 (dd, *J* = 8.8, 5.6 Hz, 1H), 3.75 (dd, *J* = 12.9, 8.9 Hz, 1H), 3.37-3.33 (m, 2H), 2.77 (s, 6H), 2.46 (s, 3H), 2.29 (s, 3H);

**<sup>13</sup>C NMR (150 MHz, MeOH-*d*<sub>4</sub>)** δ 170.77, 167.07, 146.08, 145.32, 142.79, 140.53, 140.07, 137.18, 135.21, 132.06, 131.56, 131.03, 130.37, 128.92, 128.23, 126.14, 124.26, 124.09, 123.83, 113.54, 65.38, 50.13, 41.44, 38.30, 23.88, 20.54, 19.99.

**HRMS (ESI-TOF)** *m/z* calcd. for [C<sub>28</sub>H<sub>27</sub>N<sub>3</sub>O<sub>3</sub>]<sup>+</sup> (M-2CH<sub>3</sub>SO<sub>3</sub>H+H<sup>+</sup>) 454.2125, found 454.2123.

*ee* was determined by simple Boc-derivatization to afford amide **16**.

**HPLC data:** >98% *ee* (CHIRALPAK AD-H column, *n*-hexane/*i*-PrOH 70:30, flow rate 1.00 mL/min, 220 nm; *t*<sub>(R)</sub>minor= 11.7 min, *t*<sub>(R)</sub>major = 15.3 min);

# HRMS of (S)-Netarsudil dimesylate (1)

## Display Report

### Analysis Info

Analysis Name D:\Data\Kolotyrkina\2025\Kovalevskii\0911013.d  
 Method tune\_low.m  
 Sample Name /ZSGN RA-767.01  
 Comment C28H29N3O3 clb added CH3OH

Operator BDAL@DE  
 Instrument / Ser# micrOTOF 10248

### Acquisition Parameter

|             |            |                      |          |                  |           |
|-------------|------------|----------------------|----------|------------------|-----------|
| Source Type | ESI        | Ion Polarity         | Positive | Set Nebulizer    | 0.4 Bar   |
| Focus       | Not active |                      |          | Set Dry Heater   | 180 °C    |
| Scan Begin  | 50 m/z     | Set Capillary        | 4500 V   | Set Dry Gas      | 4.0 l/min |
| Scan End    | 3000 m/z   | Set End Plate Offset | -500 V   | Set Divert Valve | Waste     |

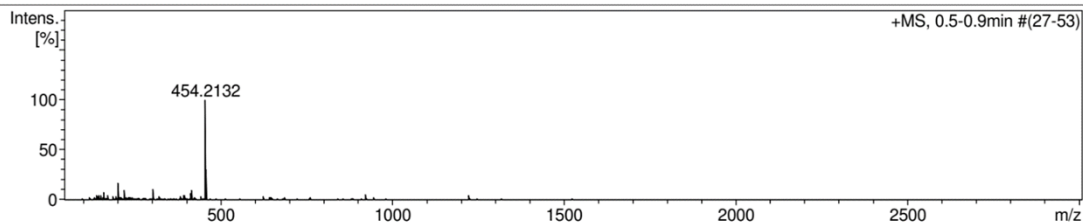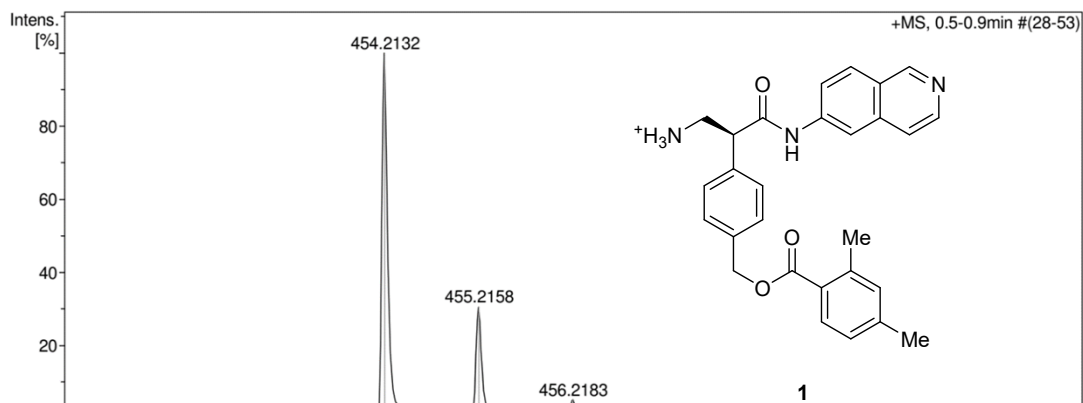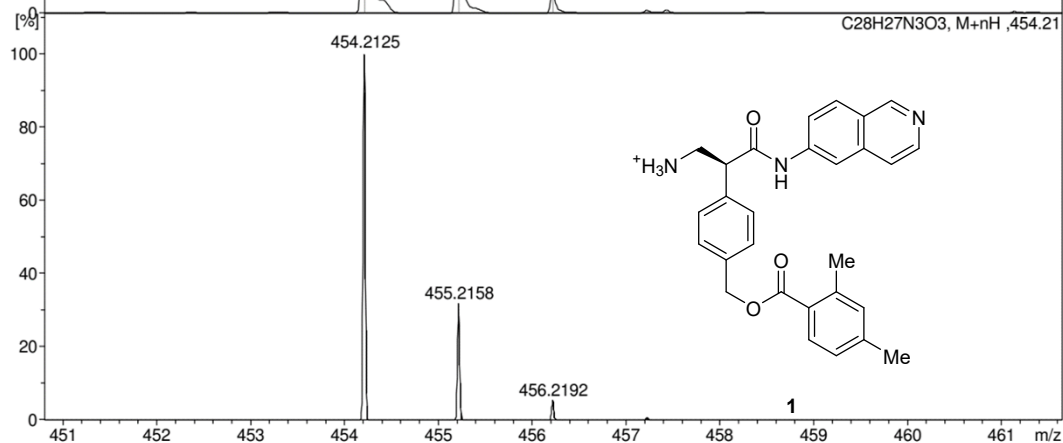

### 3. NMR pictures for all compounds

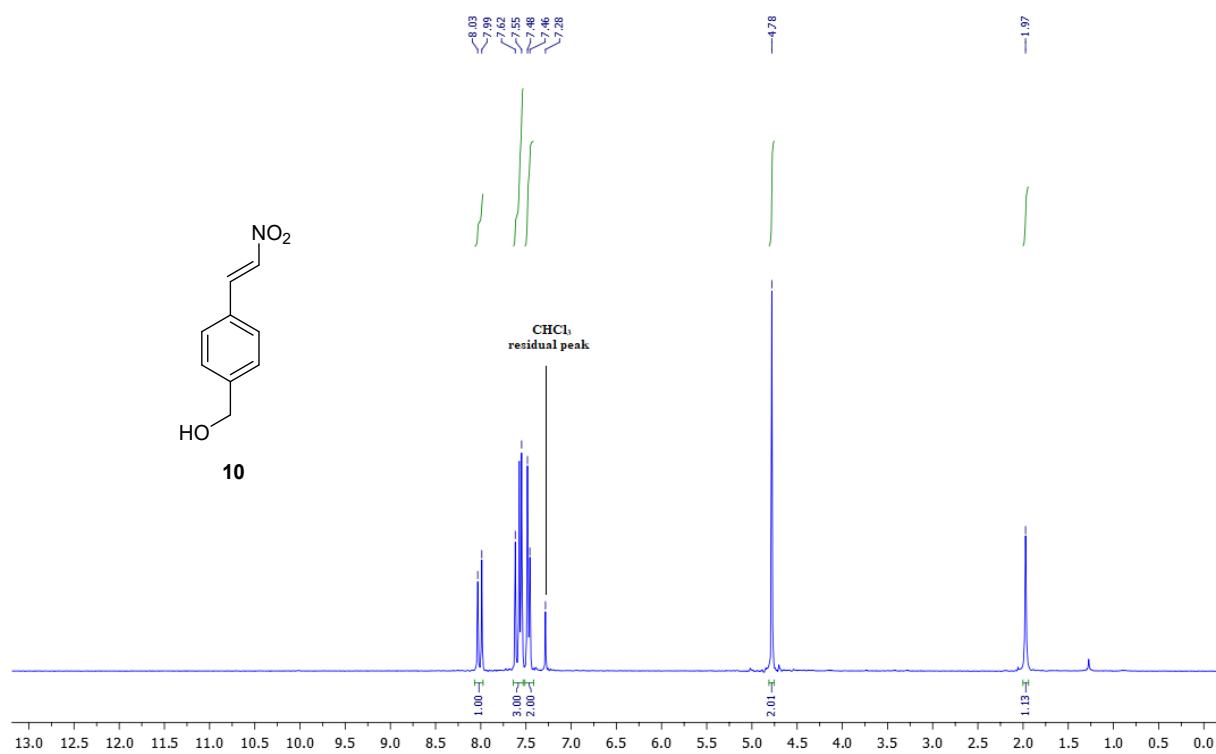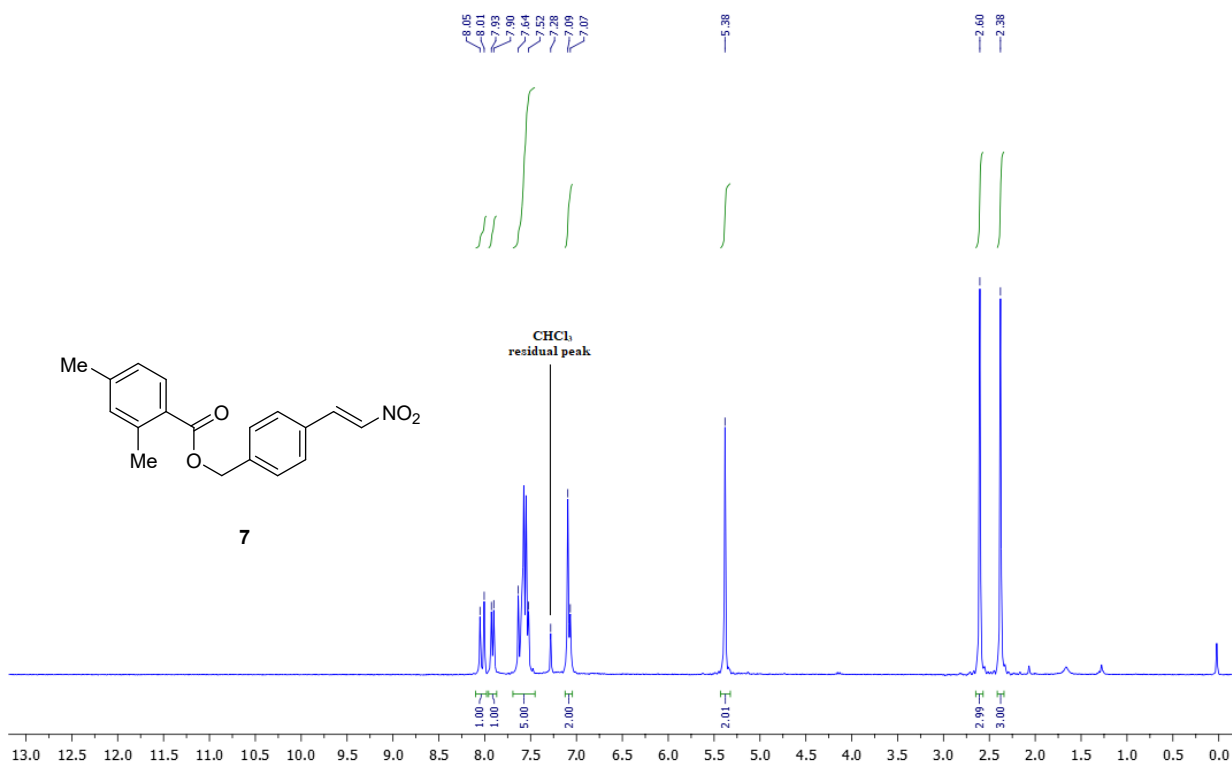



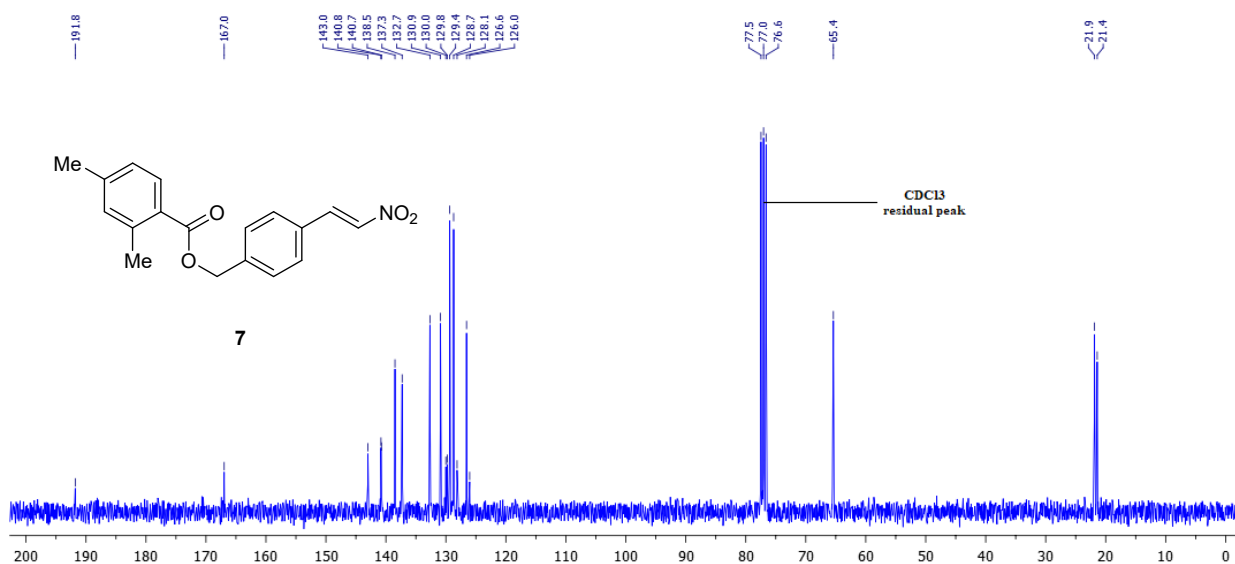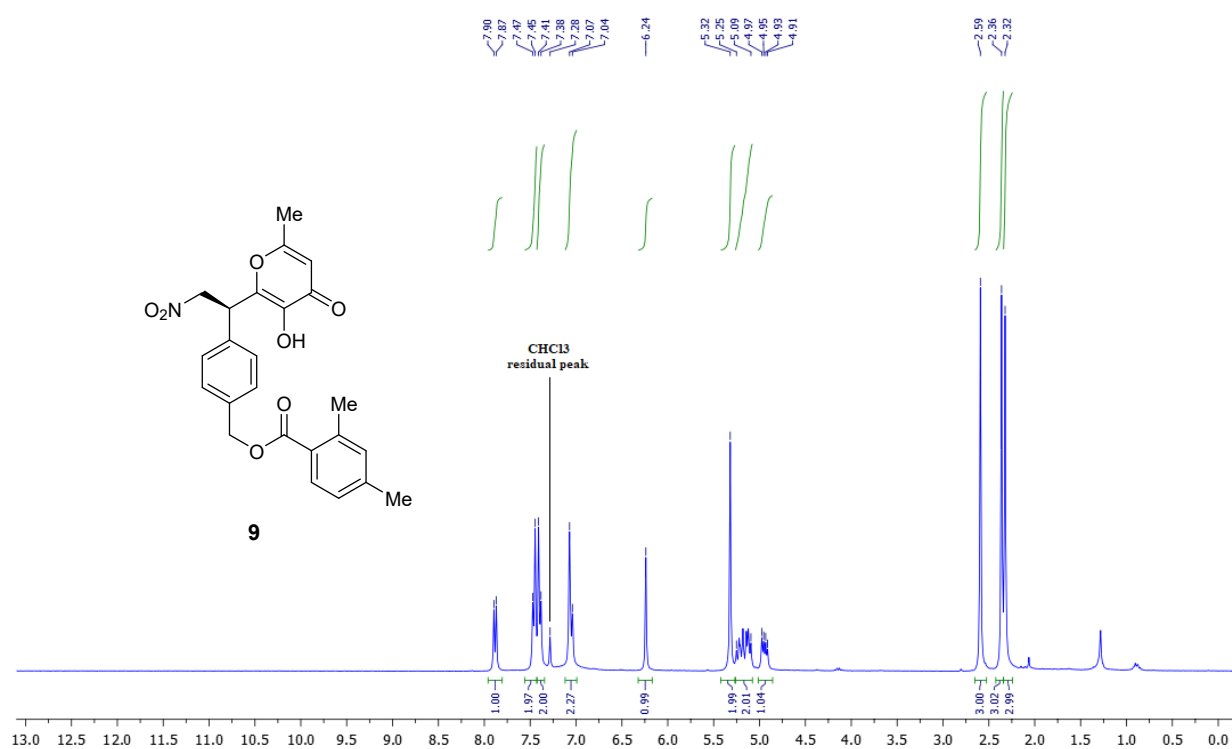

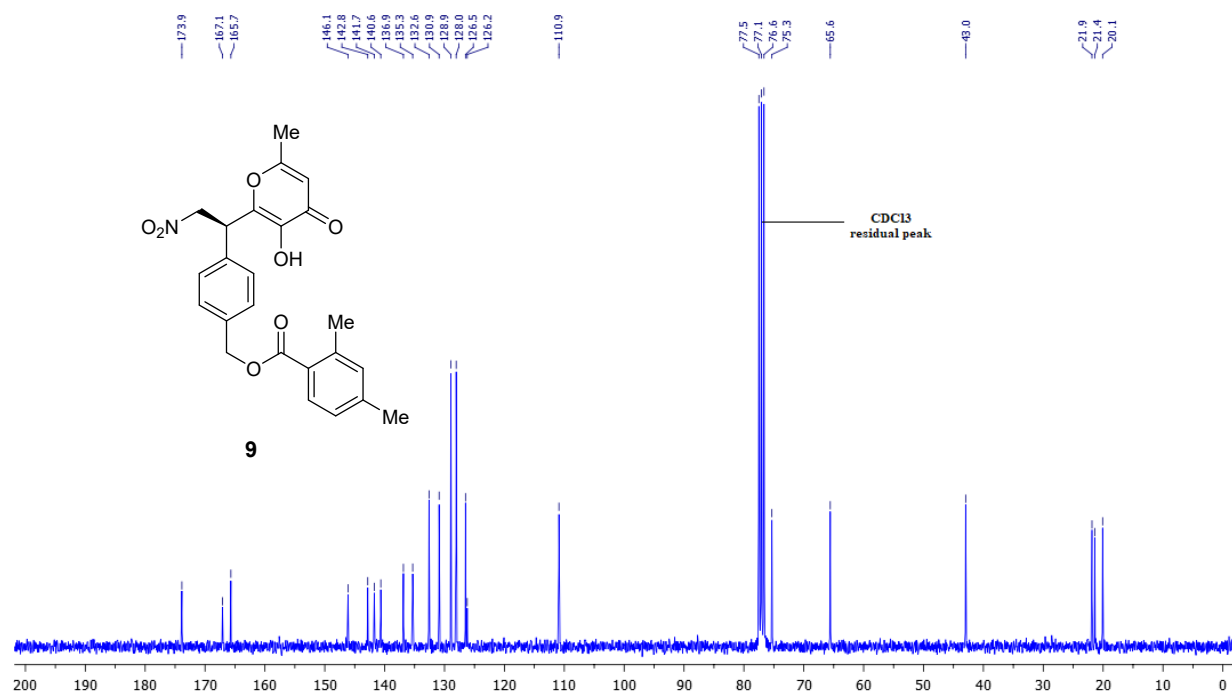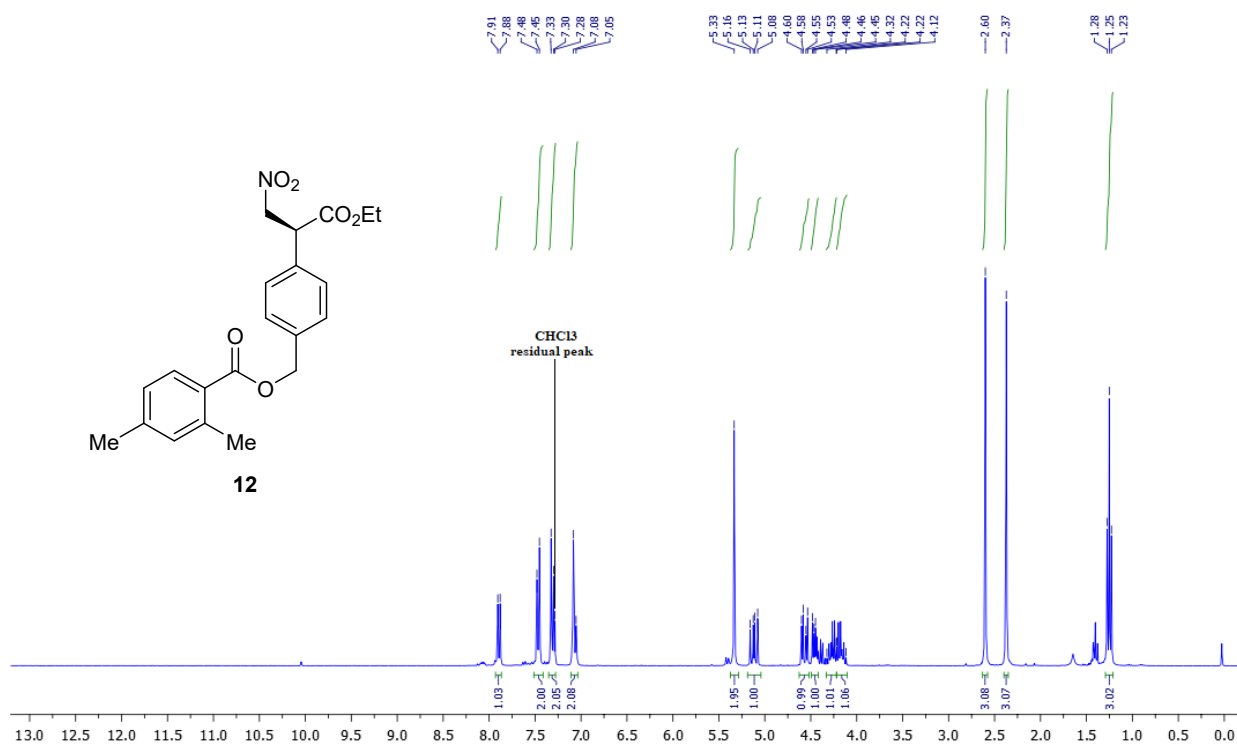

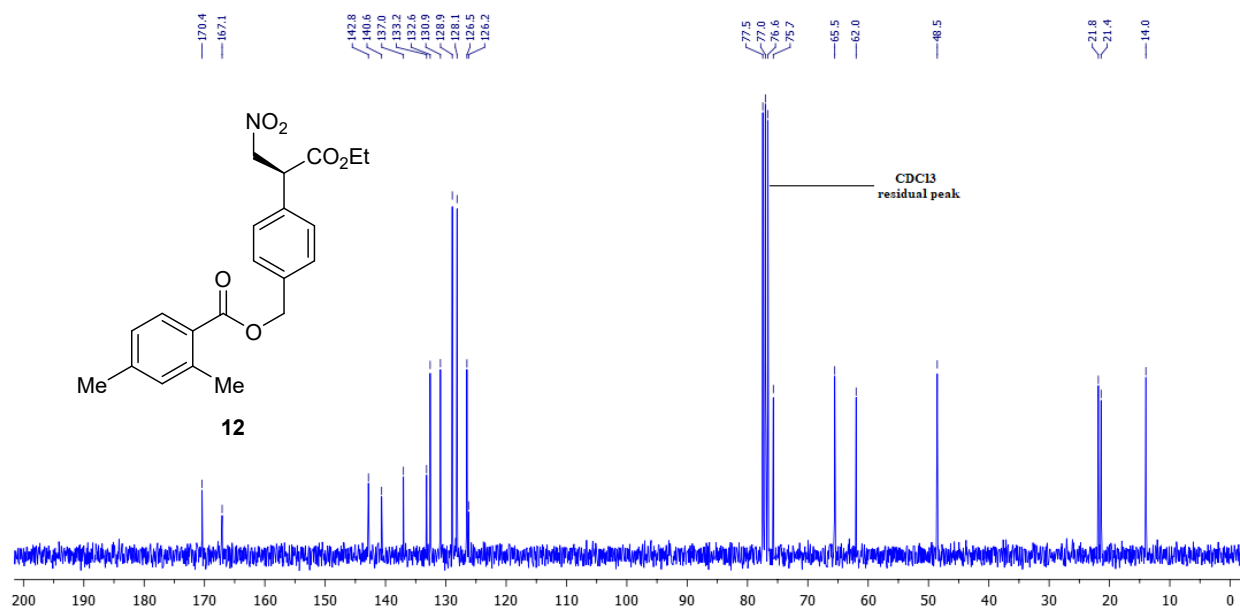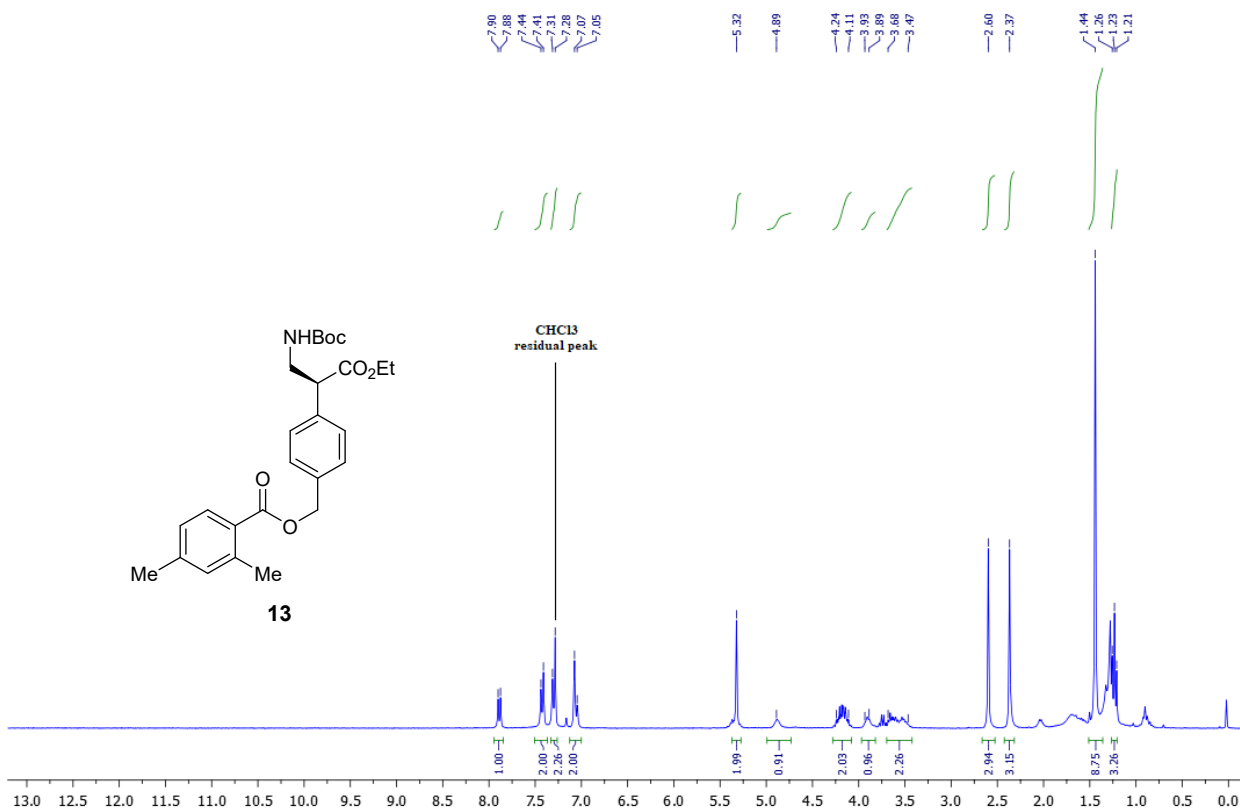

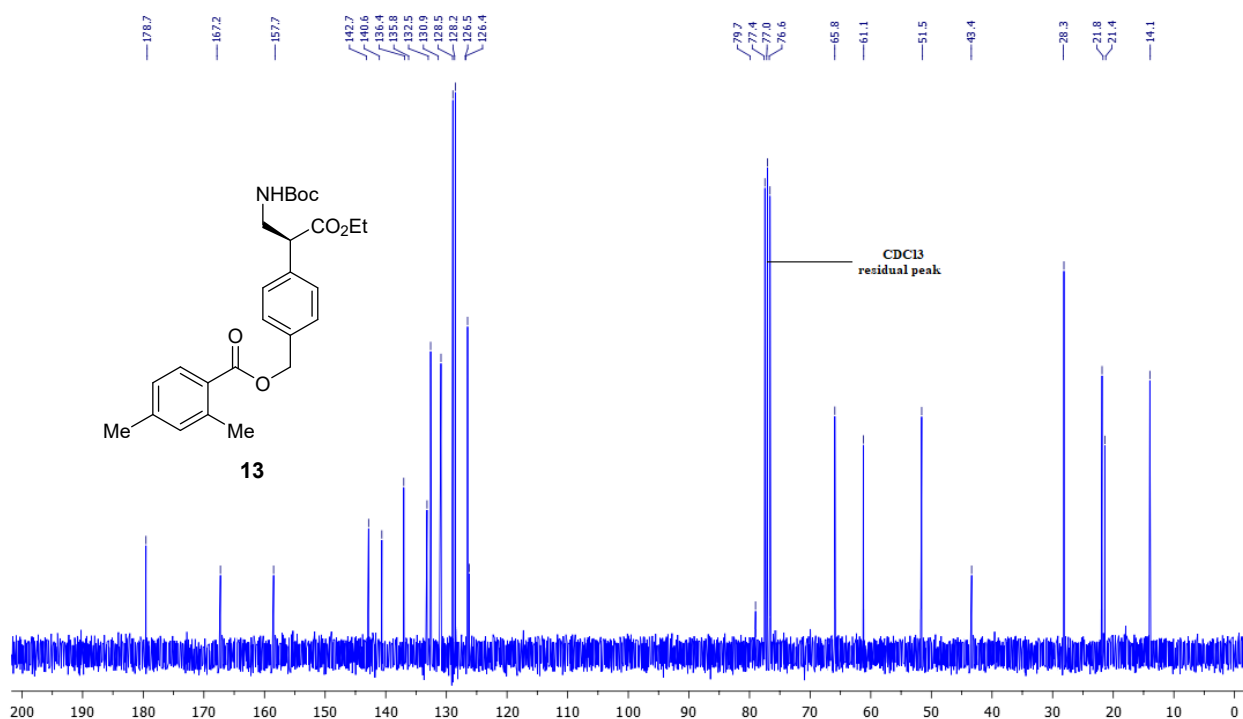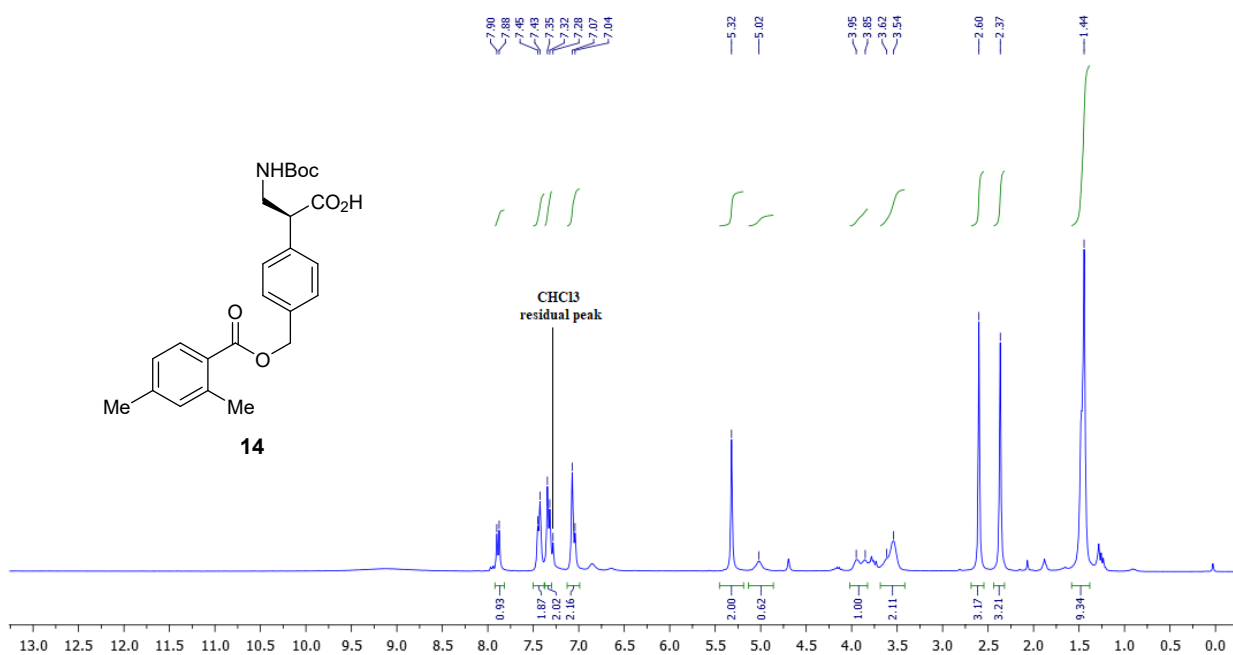

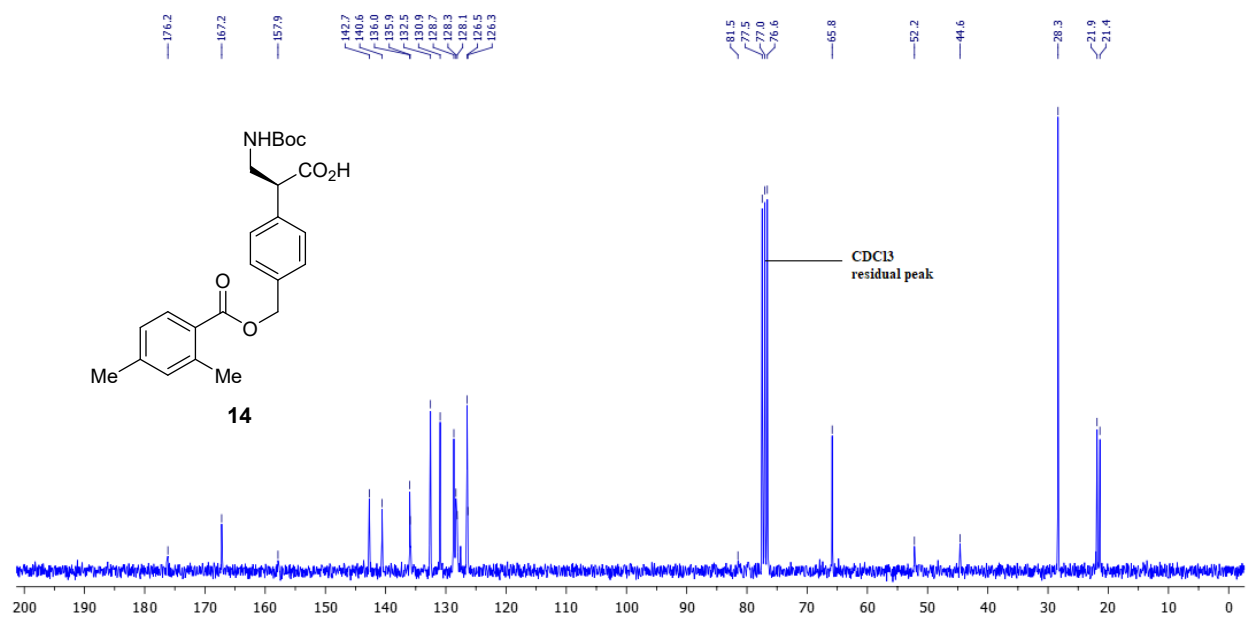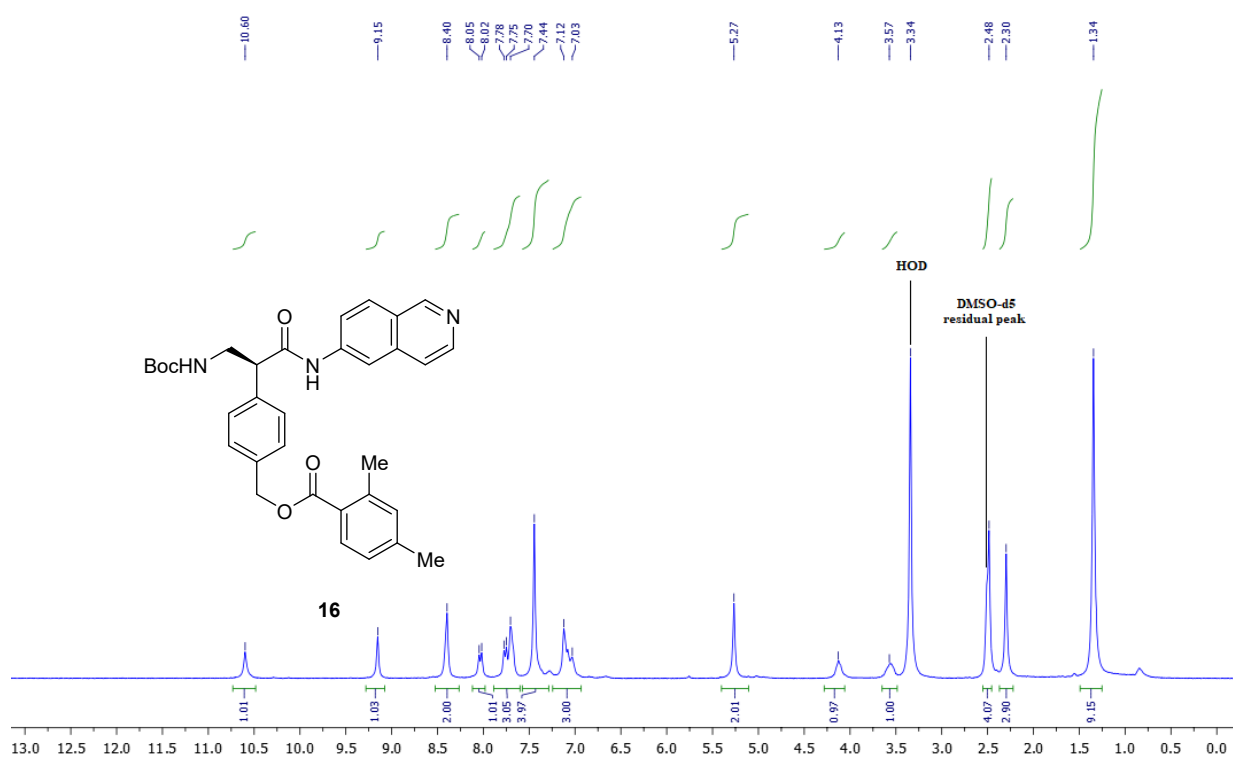

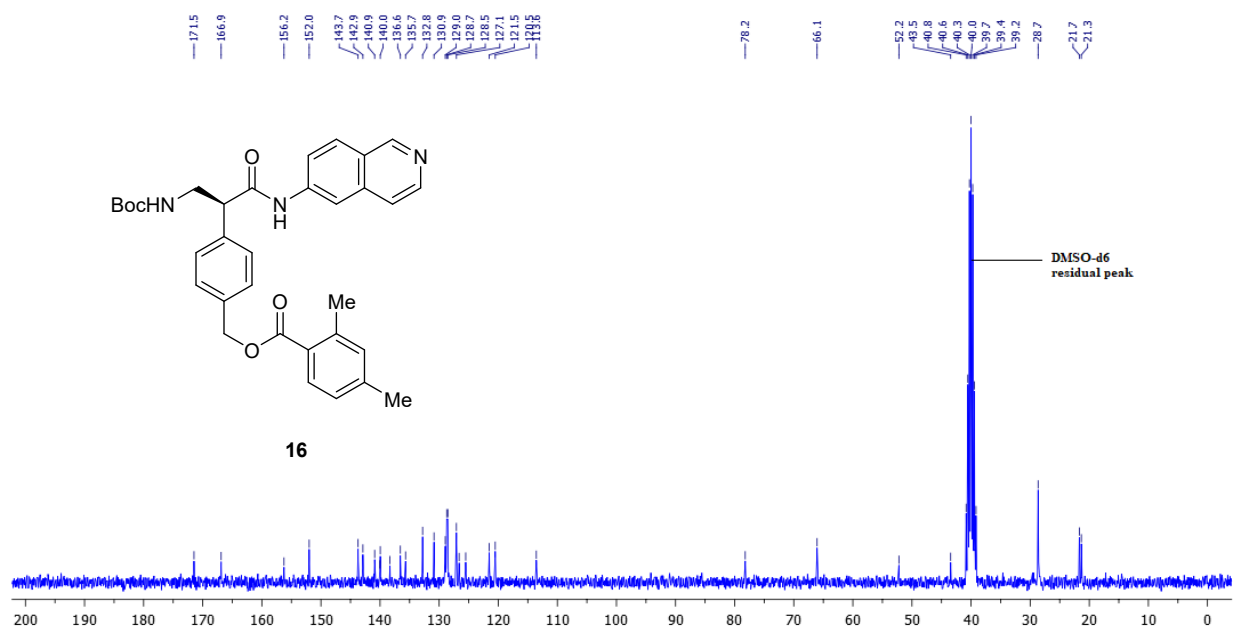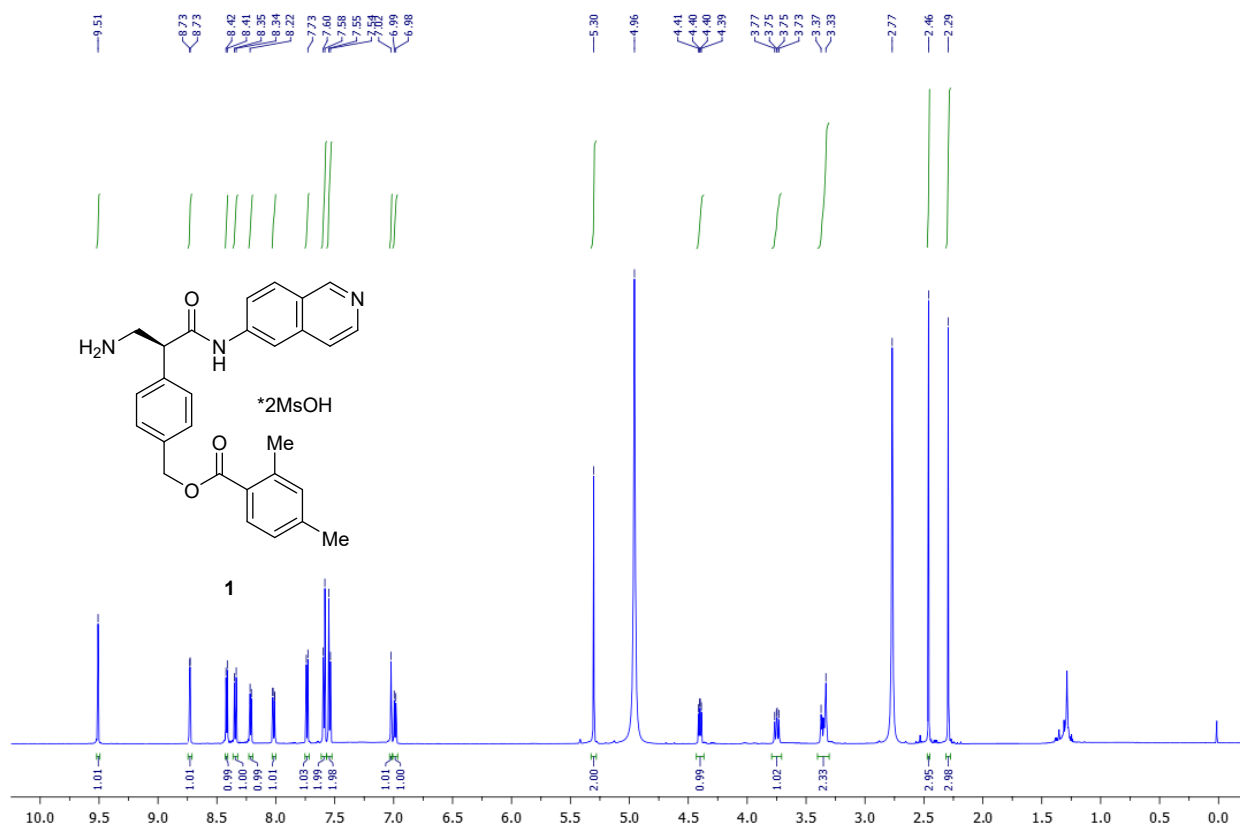

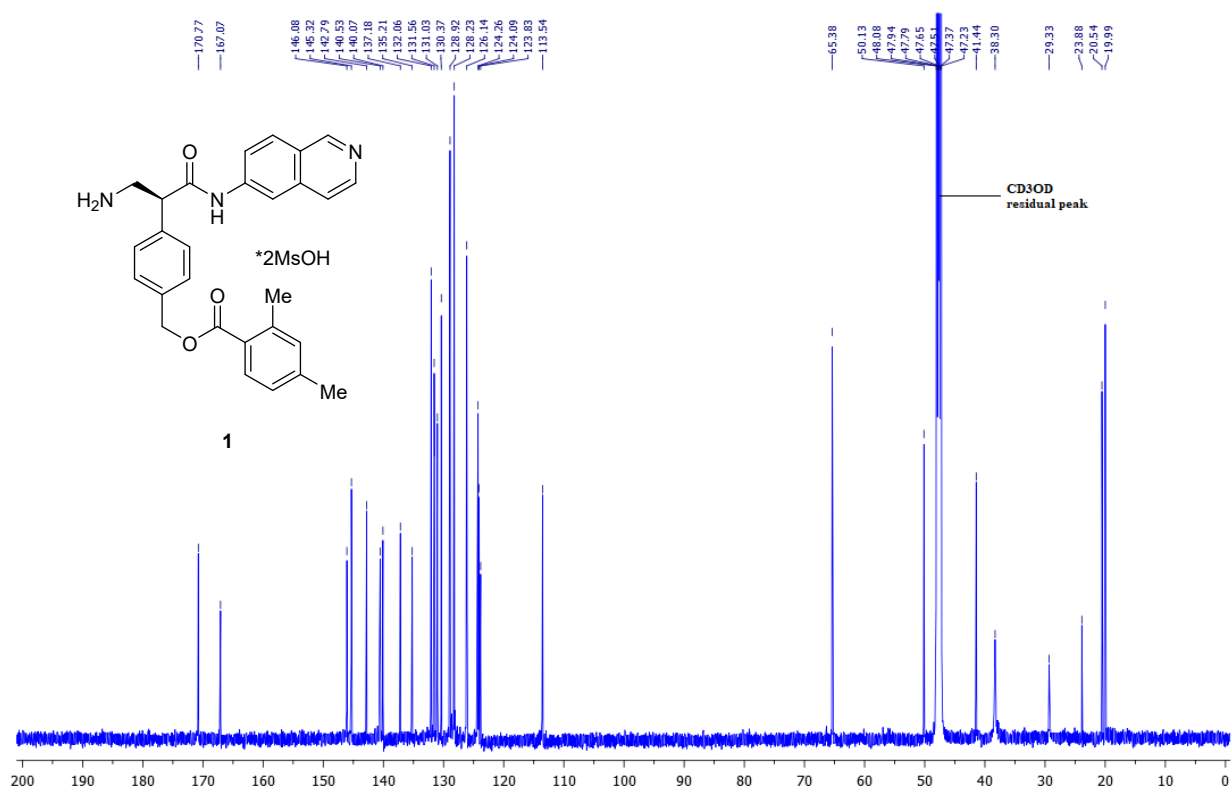

#### 4. HPLC data for all compounds

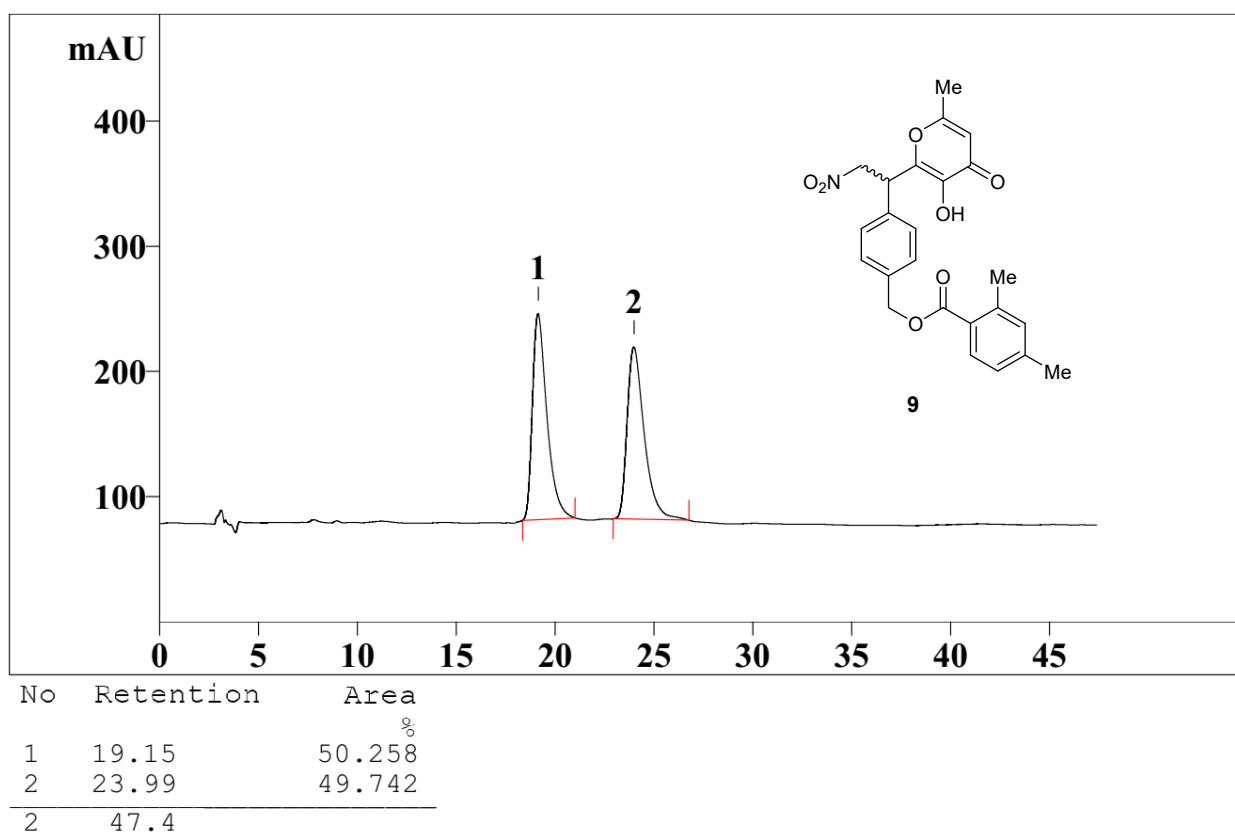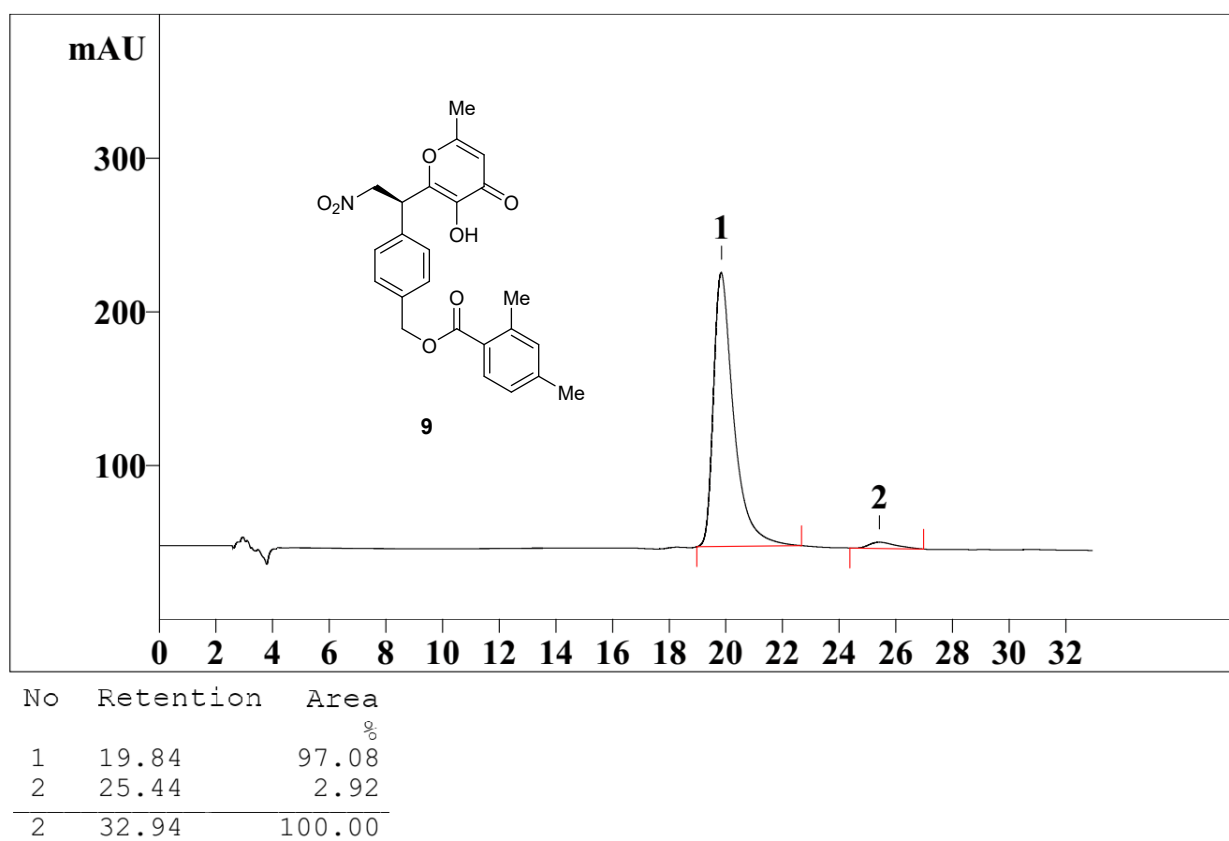



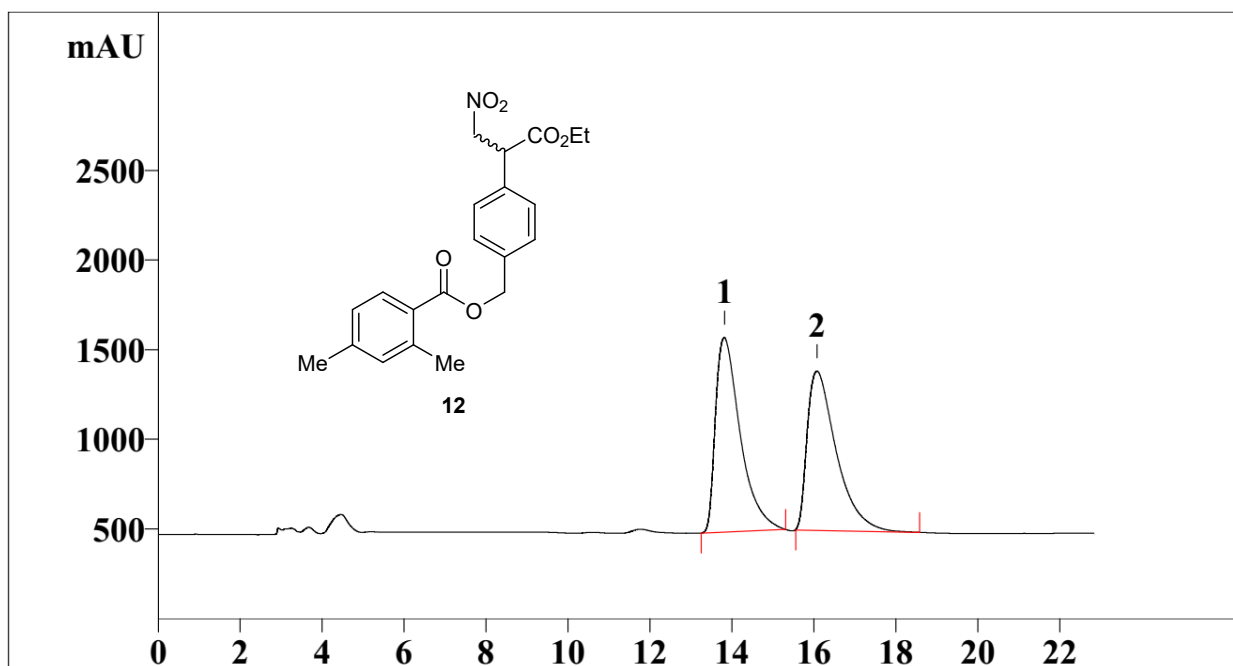

| No | Retention | Area   |
|----|-----------|--------|
|    |           | %      |
| 1  | 13.81     | 50.962 |
| 2  | 16.08     | 49.038 |
| 2  | 22.84     |        |

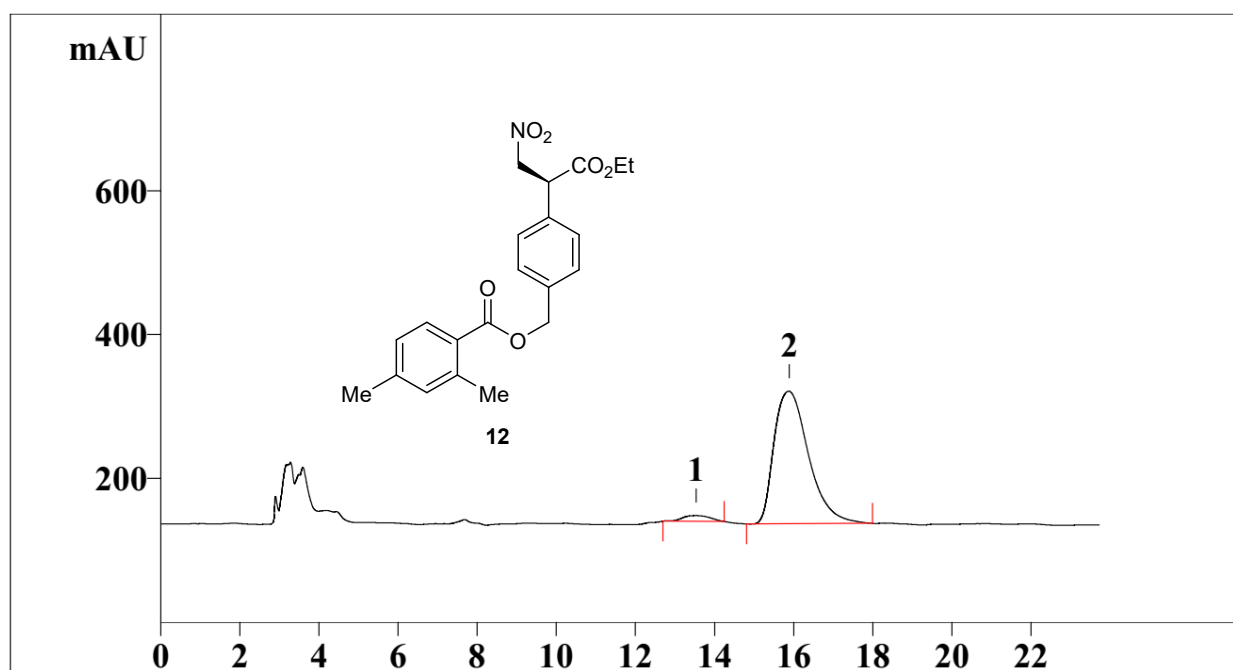

| No | Retention | Area   |
|----|-----------|--------|
|    |           | %      |
| 1  | 13.53     | 3.3188 |
| 2  | 15.88     | 96.681 |
| 2  | 23.73     |        |

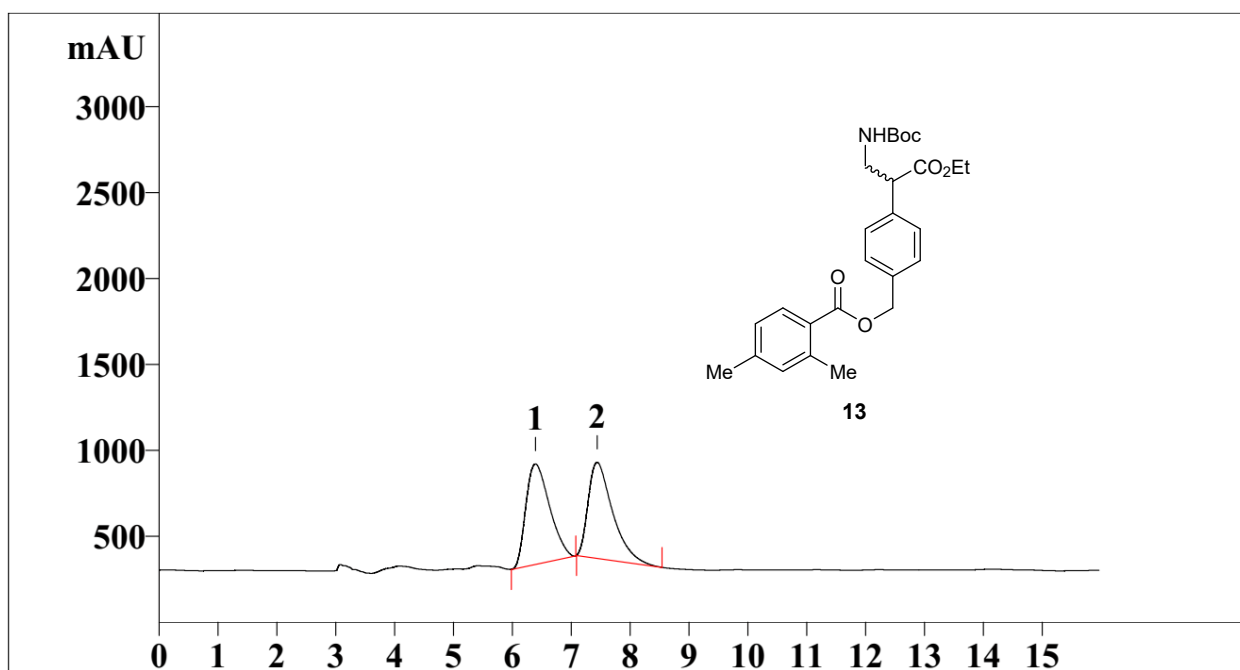

| No | Retention | Area   |
|----|-----------|--------|
|    |           | %      |
| 1  | 6.388     | 50.134 |
| 2  | 7.445     | 49.866 |
| 2  | 15.97     |        |

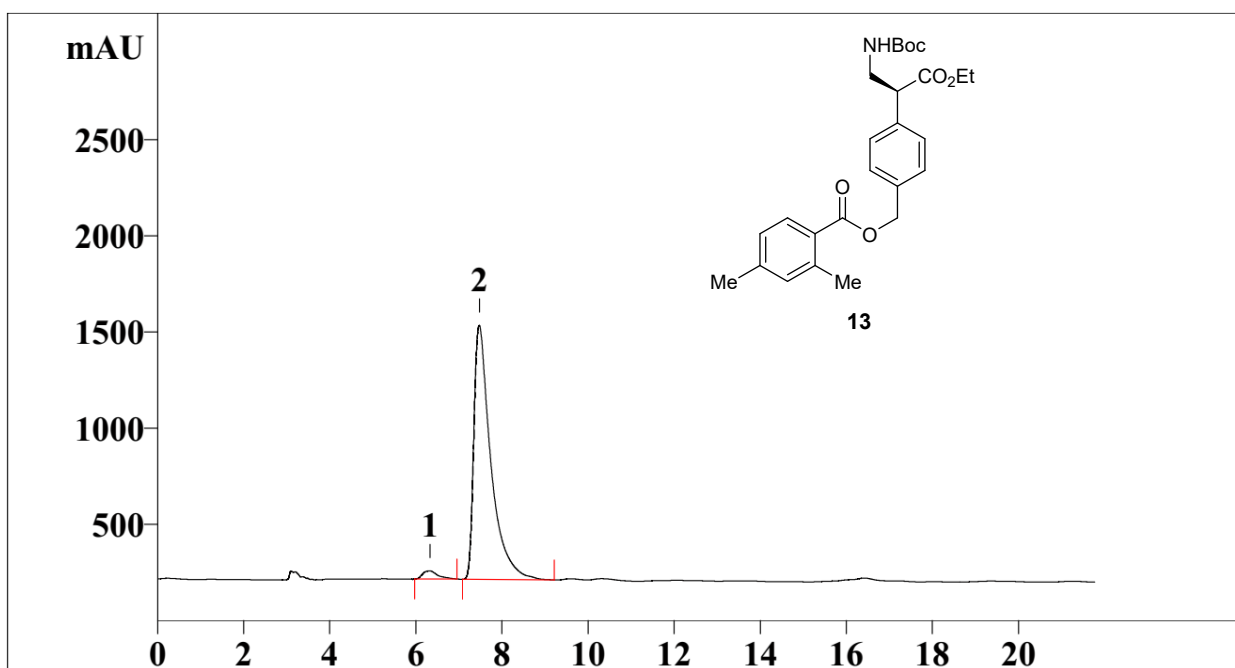

| No | Retention | Area   |
|----|-----------|--------|
|    |           | %      |
| 1  | 6.254     | 2.7615 |
| 2  | 7.475     | 97.239 |
| 2  | 21.78     |        |

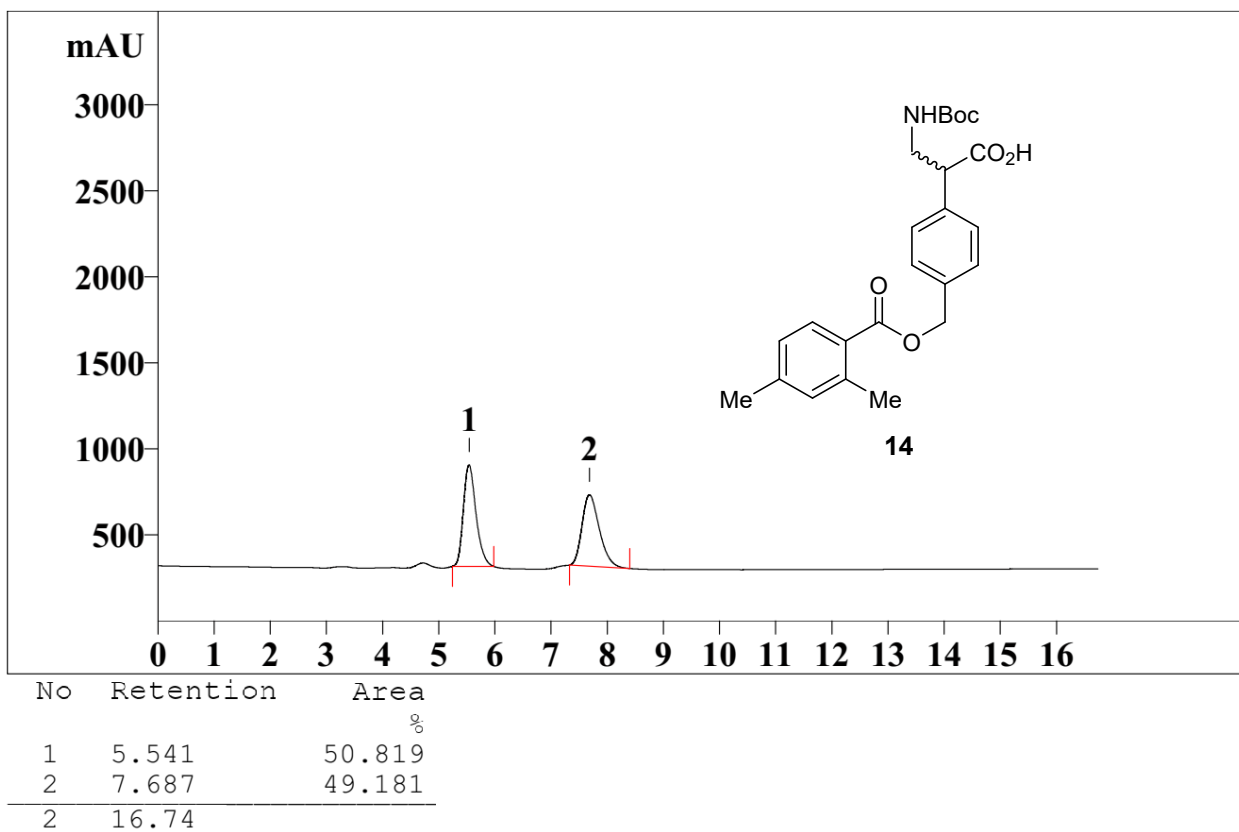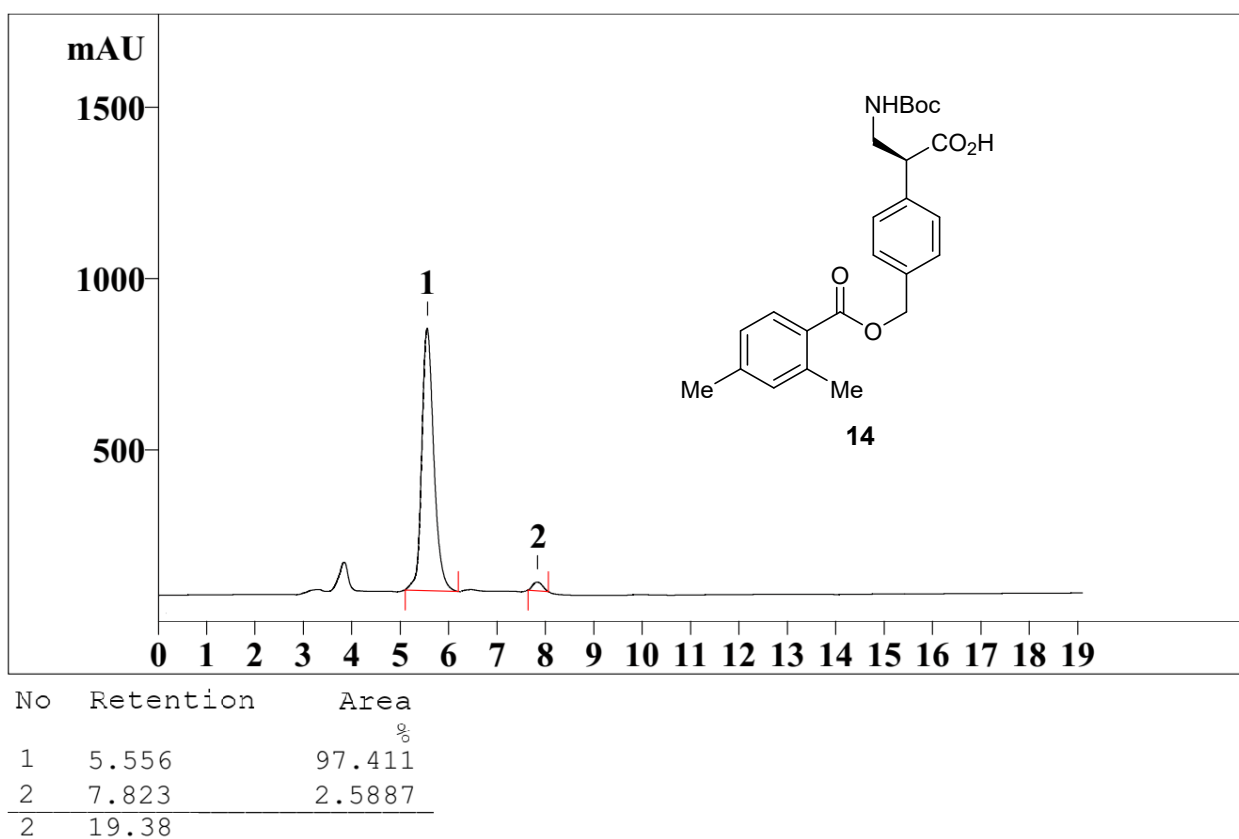

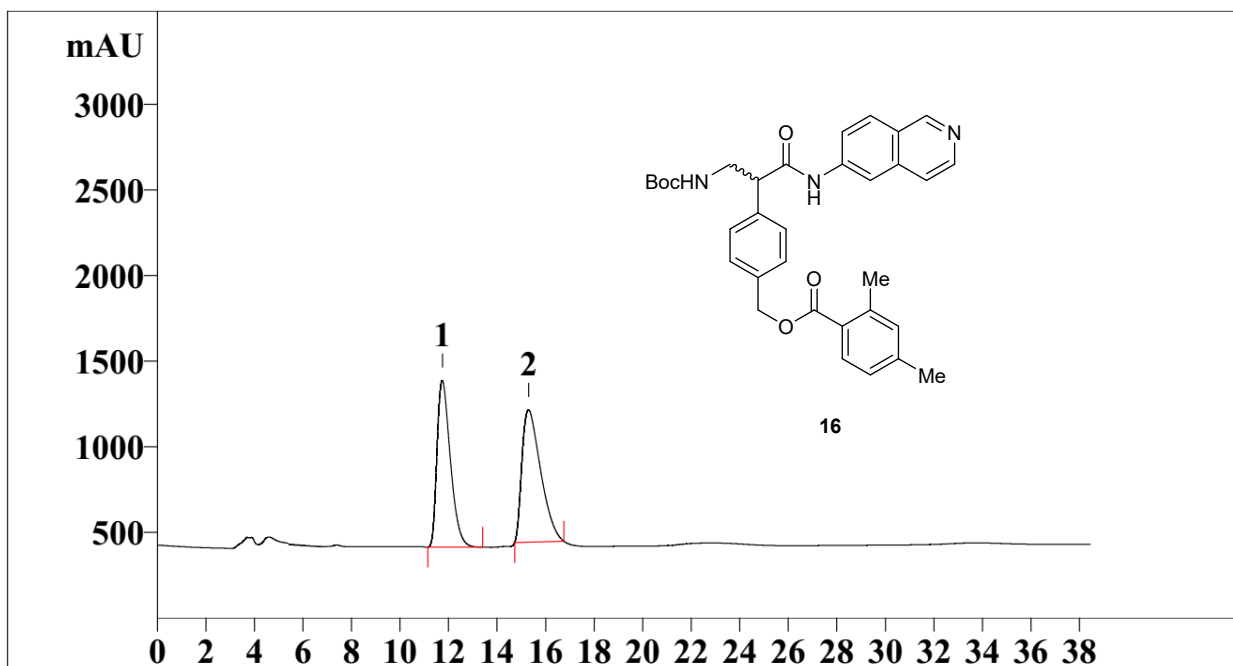

| No | Retention | Area  |
|----|-----------|-------|
|    |           | %     |
| 1  | 11.74     | 47.41 |
| 2  | 15.29     | 52.59 |
| 2  | 38.57     |       |

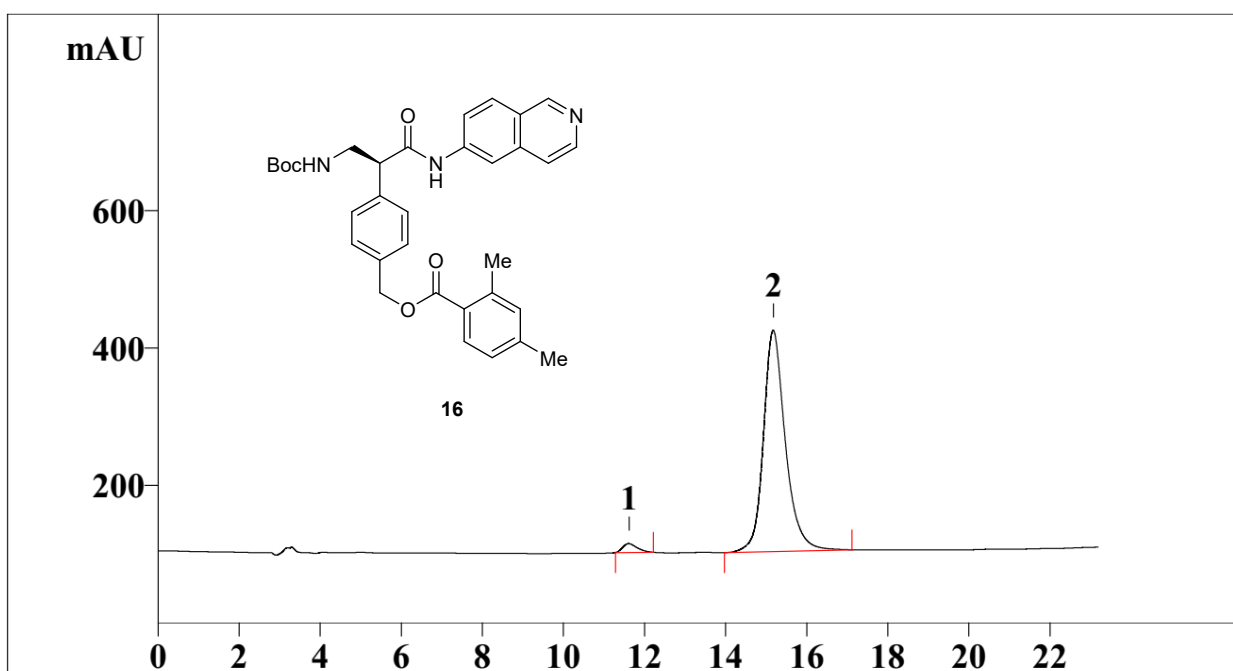

| No | Retention | Area   |
|----|-----------|--------|
|    |           | %      |
| 1  | 11.61     | 2.5309 |
| 2  | 15.34     | 97.469 |
| 2  | 23.19     |        |

## References

- [1] H. Konishi, T. Y. Lam, J. P. Malerich, V. H. Rawal, *Org. Lett.* **2010**, *12*, 2028 – 2031;
- [2] A. S. Kucherenko, A. A. Kostenko, A. N. Komogortsev, B. V. Lichitsky, M. Yu. Fedotov, S. G. Zlotin, *J. Org. Chem.* **2019**, *84*, 4304 – 4311;
- [3] A. A. Kostenko, A. S. Kucherenko, S. G. Zlotin, *Tetrahedron* **2018**, *74*, 4769 – 4776;
- [4] A. A. Kostenko, A. S. Kucherenko, A. N. Komogortsev, B. V. Lichitsky, S. G. Zlotin, *Org. Biomol. Chem.* **2018**, *16*, 9314 – 9318;
- [5] S. del Pozo, S. Vera, M. Oiarbide, and C. Palomo, *J. Am. Chem. Soc.* **2017**, *139*, 15308-15311;
- [6] R. Murata, K. Asano, S. Matsubara, *Tetrahedron* **2021**, *97*, 132381;
- [7] M. Wilsdorf, D. Schmidt, M. P. Bartetzko, P. Dallabernardina, F. Schuhmacher, P. H. Seebergerab, F. Pfrengle, *Chem. Commun.* **2016**, *52*, 10187-10189;
- [8] S. Peterli, D. Hubmann, U. Séquin, H. Mett, P. Traxler, *Helvetica Chimica Acta* **1994**, *77*, 59 – 69;
- [9] Y. Wang, Y. Du, X. Huang, X. Wu, Y. Zhang, S. Yang, Y. R. Chi, *Org. Lett.* **2017**, *19*, 632-635;
- [10] M. A. DeLong, J. M. Sturdivant, Asymmetric Synthesis of Netarsudil: A New Therapeutic for Open-Angle Glaucoma, *Synthesis* **2018**, *50*, A–G.
